# Supplementary material for: Assessment of pathological response to therapy using lipid mass spectrometry imaging
Source: PubMed Central journal article supplement (PMC5107952; doi:10.1038/srep36814), 2016-11-14
Supplement: srep36814-s1.pdf [file srep36814-s1.pdf]

# **Title:** Assessment of pathological response to therapy using lipid mass spectrometry imaging

Nathan Heath Patterson<sup>1\*</sup>, Balqis Alabdulkarim<sup>2,3\*</sup>, Anthoula Lazaris<sup>2,3</sup>, Aurélien Thomas<sup>4,5</sup>, Martin M. Marcinkiewicz<sup>6</sup>, Zuhua Gao<sup>3,7</sup>, Peter B. Vermeulen<sup>8</sup>, Pierre Chaurand<sup>1§</sup> and Peter Metrakos<sup>2,3§</sup>

1) Department of Chemistry, University of Montreal, Montreal, Quebec, Canada

2) Department of Surgery, McGill University Health Center, Quebec, Canada

3) Cancer Research Program, McGill University Health Center-Research Institute

4) Unit of Toxicology, University Centre of Legal Medicine, Geneva-Lausanne, Switzerland

5) Faculty of Biology and Medicine, Lausanne University Hospital, University of Lausanne, Lausanne, Switzerland

6) Cytochem Inc., 6465 Durocher Avenue, Montreal, Quebec, Canada

7) Department of Pathology, McGill University Health Center, Quebec, Canada

8) Translational Cancer Research Unit, GZA Hospitals St.-Augustinus, 2610, Wilrijk, Belgium

\* These authors contributed equally

## **§ Corresponding authors:**

|                                                                                                                                                              |                                                                                          |
|--------------------------------------------------------------------------------------------------------------------------------------------------------------|------------------------------------------------------------------------------------------|
| Peter Metrakos<br>Department of Surgery, Section of Hepatobiliary and Transplant Surgery,<br>McGill University Health Center,<br>Montreal (Quebec)<br>Canada | Tel: (+1) 514 843 1600<br>Fax: (+1) (514) 843-1434<br>E-mail: peter.metrakos@mcgill.ca   |
| Pierre Chaurand<br>Department of Chemistry<br>Université de Montréal<br>Montreal (Quebec)<br>Canada                                                          | Tel: (+1) 514 343 2088<br>Fax: (+1) 514 343 7586<br>E-mail: pierre.chaurand@umontreal.ca |

**Supplemental Table 1. Patient characteristics separated by training and validation set.** Training set 12 lesions from 12 patients. Validation set 40 lesions from 38 patients (2 patients underwent stage resection).

\*n=38 \*\*n=40

| Variable                              | Training Set |             |         | Validation set |              |          |
|---------------------------------------|--------------|-------------|---------|----------------|--------------|----------|
|                                       | No.(%)       | Mean (SD)   | Range   | No.(%)         | Mean (SD)    | Range    |
| <i>Age (years)</i>                    |              | 62.7 (15.9) | 31-81   |                | *63.2 (11.7) | *40-81   |
| <i>Sex</i>                            |              |             |         |                |              |          |
| Male                                  | 5 (41.7)     |             |         | *26 (68.4)     |              |          |
| Female                                | 7 (58.3)     |             |         | *12 (31.5)     |              |          |
| <i>Location of Primary Disease</i>    |              |             |         |                |              |          |
| Proper Colon                          | 4 (33.3)     |             |         | *11(28.9)      |              |          |
| Sigmoid Colon                         | 4 (33.3)     |             |         | *5 (13.15)     |              |          |
| Rectum                                | 4 (33.3)     |             |         | *14 (36.8)     |              |          |
| Unknown                               | 0 (0)        |             |         | *8 (21)        |              |          |
| <i>Stage of Primary Disease (TNM)</i> |              |             |         |                |              |          |
| T (size)                              |              |             |         |                |              |          |
| T1                                    | 0 (0)        |             |         | *1 (2.6)       |              |          |
| T2                                    | 0 (0)        |             |         | *2 (5.2)       |              |          |
| T3                                    | 7 (58.3)     |             |         | *20 (52.6)     |              |          |
| T4                                    | 4 (33.3)     |             |         | *4 (10.4)      |              |          |
| Unknown                               | 1 (8.3)      |             |         | *11 (28.9)     |              |          |
| N (lymph node involvement)            |              |             |         |                |              |          |
| N0                                    | 3 (25)       |             |         | *8 (21)        |              |          |
| N1                                    | 6 (50)       |             |         | *10 (26.3)     |              |          |
| N2                                    | 2 (16.6)     |             |         | *7 (18.4)      |              |          |
| Unknown                               | 1 (8.3)      |             |         | *13 (34.2)     |              |          |
| <i>Disease Free interval</i>          |              |             |         |                |              |          |
| Synchronous                           | 12 (100)     |             |         | **21 (52.5)    |              |          |
| Metachrnous                           | 0 (0)        |             |         | **19 (47.5)    |              |          |
| <i>Location of Liver Lesion</i>       |              |             |         |                |              |          |
| Right Lobe                            | 9 (75)       |             |         | **20 (50)      |              |          |
| Lift Lobe                             | 3 (25)       |             |         | **18 (45)      |              |          |
| Bilobar                               | 0 (0)        |             |         | **2 (5)        |              |          |
| <i>No. of Lesions</i>                 |              | 2.1 (1.9)   | 1-7     |                | **2.6 (1.9)  | **1-10   |
| ≤ 4                                   | 10 (83.3)    |             |         | **29 (72.5)    |              |          |
| > 4                                   | 2 (16.6)     |             |         | **11 (27.5)    |              |          |
| <i>Size of Lesion (cm)</i>            |              | 4.7 (2.3)   | 0.3-9.2 |                | **3.4 (2.3)  | **0.8-10 |
| ≤ 5 cm                                | 6 (50)       |             |         | ••31(77.5)     |              |          |
| > 5 cm                                | 6 (50)       |             |         | ••9 (22.5)     |              |          |
| <i>Chemotherapy Status</i>            |              |             |         |                |              |          |
| Chemo-naive                           | 3 (25)       |             |         | ••14 (35)      |              |          |
| Treated                               | 9 (75)       |             |         | ••26 (65)      |              |          |

**Supplemental Table 2: Pathologists and MSI mTRG gradings for all samples.**

| serial no. | Path1 | Path2               | MSI |
|------------|-------|---------------------|-----|
| 1          | 1     | 2                   | 1   |
| 2          | 2     | 2                   | 2   |
| 3          | 3     | 3                   | 3   |
| 4          | 3     | 5                   | 3   |
| 5          | 3     | 3                   | 3   |
| 6          | 4     | 4                   | 4   |
| 7          | 4     | 5                   | 3   |
| 8          | 2     | 2                   | 1   |
| 9          | 4     | 4                   | 4   |
| 10         | 4     | 5                   | 4   |
| 11         | 5     | 4                   | 4   |
| 12         | 3     | 4                   | 3   |
| 13         | 3     | 3                   | 3   |
| 14         | 3     | too small to assess | 3   |
| 15         | 4     | 5                   | 3   |
| 16         | 3     | too small to assess | 3   |
| 17         | 4     | 5                   | 3   |
| 18         | 4     | 4                   | 4   |
| 19         | 1     | too small to assess | 1   |
| 20         | 4     | 3                   | 3   |
| 21         | 4     | 4                   | 3   |
| 22         | 2     | 1                   | 1   |
| 23         | 4     | 4                   | 4   |
| 24         | 2     | 1                   | 2   |
| 25         | 3     | 5                   | 4   |
| 26         | 3     | 3                   | 4   |
| 27         | 2     | too small to assess | 3   |
| 28         | 2     | 2                   | 2   |
| 29         | 3     | 2                   | 2   |
| 30         | 4     | 4                   | 3   |
| 31         | 3     | 3                   | 3   |
| 32         | 4     | too small to assess | 4   |
| 33         | 3     | 3                   | 3   |
| 34         | 1     | 1                   | 1   |
| 35         | 3     | 2                   | 3   |
| 36         | 3     | 3                   | 3   |
| 37         | 4     | 4                   | 4   |
| 38         | 4     | 4                   | 4   |
| 39         | 4     | 1                   | 5   |
| 40         | 3     | 3                   | 3   |
| 41         | 4     | 4                   | 3   |
| 42         | 4     | 4                   | 4   |
| 43         | 4     | 4                   | 3   |
| 44         | 4     | 4                   | 4   |
| 45         | 4     | 4                   | 3   |
| 46         | 4     | 4                   | 4   |
| 47         | 2     | 2                   | 2   |
| 48         | 3     | 4                   | 4   |
| 49         | 4     | 5                   | 4   |
| 50         | 2     | 2                   | 2   |
| 51         | 3     | 3                   | 2   |
| 52         | 4     | 4                   | 4   |

**Supplemental Table 3. Patient characteristics for the entire population, \*n=50 \*\*n=52**

| <b>Variable</b>                        | <b>No.(%)</b> | <b>Mean (SD)</b> | <b>Range</b> |
|----------------------------------------|---------------|------------------|--------------|
| <b>Age (years)*</b>                    |               | 63.1 (11.7)      | 31-81        |
| <b>Sex*</b>                            |               |                  |              |
| Male                                   | 31 (62)       |                  |              |
| Female                                 | 19 (38)       |                  |              |
| <b>Location of Primary Disease*</b>    |               |                  |              |
| Proper Colon                           | 8 (16)        |                  |              |
| Sigmoid Colon                          | 15 (30)       |                  |              |
| Rectum                                 | 17 (34)       |                  |              |
| Unknown                                | 10 (20)       |                  |              |
| <b>Stage of Primary Disease (TNM)*</b> |               |                  |              |
| <b>T (size)</b>                        |               |                  |              |
| T1                                     | 1 (2)         |                  |              |
| T2                                     | 2 (4)         |                  |              |
| T3                                     | 27 (54)       |                  |              |
| T4                                     | 8 (16)        |                  |              |
| Unknown                                | 12 (24)       |                  |              |
| <b>N (lymph node)</b>                  |               |                  |              |
| N0                                     | 11 (22)       |                  |              |
| N1                                     | 16 (32)       |                  |              |
| N2                                     | 9 (18)        |                  |              |
| Unknown                                | 14 (28)       |                  |              |
| <b>Disease Free interval**</b>         |               |                  |              |
| Synchronous                            | 33 (63.4)     |                  |              |
| Metachronous                           | 19 (36.5)     |                  |              |
| <b>Location of Liver Lesion**</b>      |               |                  |              |
| Right Lobe                             | 31 (59.6)     |                  |              |
| Left Lobe                              | 19 (36.5)     |                  |              |
| Bi-lobular                             | 2 (3.8)       |                  |              |
| <b>No. of Lesions**</b>                |               | 2.5 (2.1)        | 1-10         |
| ≤ 4                                    | 43 (82.6)     |                  |              |
| > 4                                    | 9 (17.3)      |                  |              |
| <b>Size of Lesion (cm)**</b>           |               | 3.7 (2.3)        | 0.3-10       |
| ≤ 5 cm                                 | 36 (69.2)     |                  |              |
| > 5 cm                                 | 16 (30.7)     |                  |              |
| <b>Chemotherapy Status</b>             |               |                  |              |
| Chemo-naive                            | 17(32.6)      |                  |              |
| Chemo-treated                          | 35(67.3)      |                  |              |

**Supplemental Figure 1. Overall Survival (OS) and Disease Free Survival (DFS).** **A** Training Set: estimated 1-year and 3-year OS were observed at 100% and 81.8% respectively. Estimated 1-year and 3-year DFS were observed at 58.3% and 48.6% respectively. **B** Validation set: estimated 1-year and 3-year OS were observed at 100% and 81.6% respectively. Estimated 1-year and 3-year DFS were observed at 47.3% and 44.2% respectively.

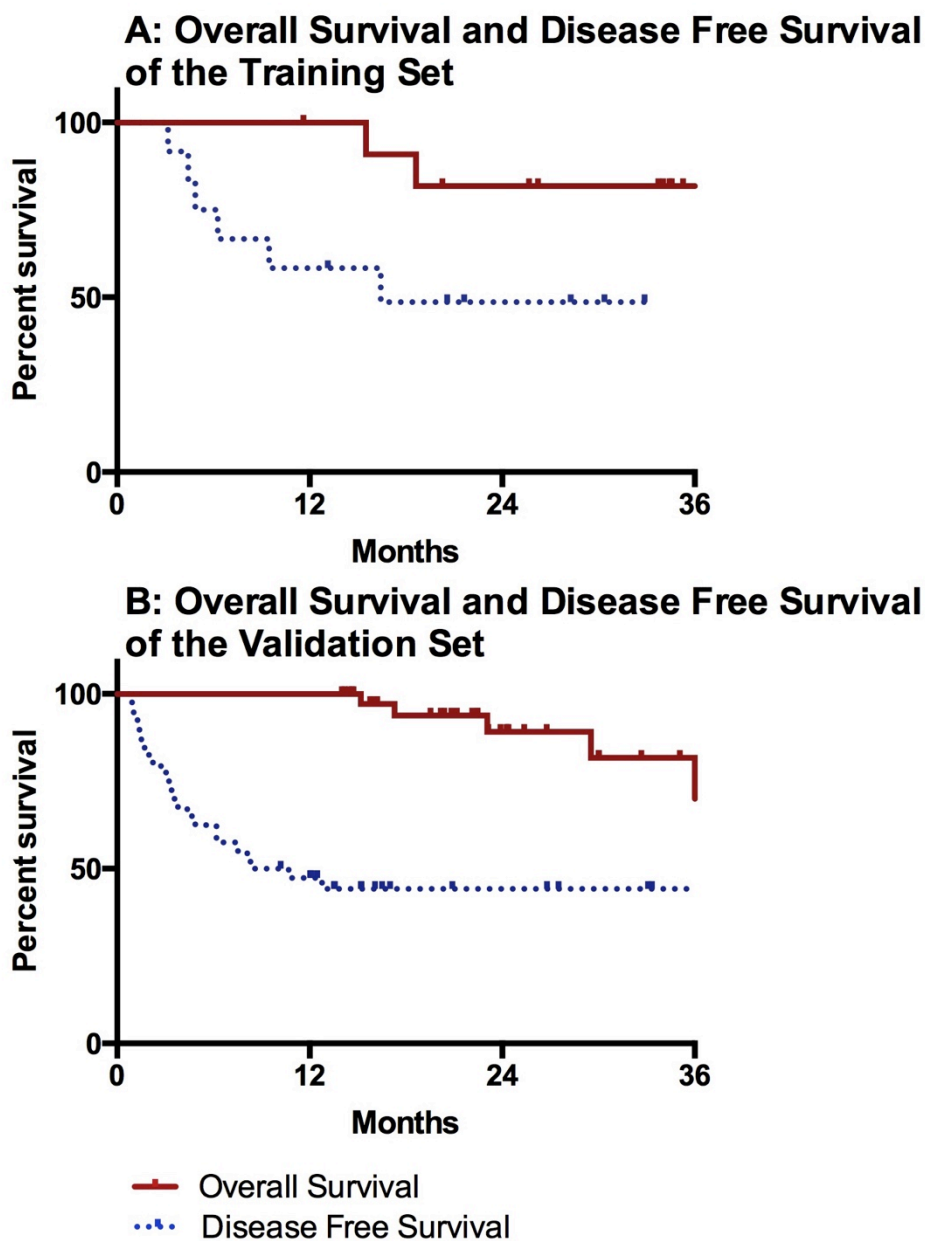

## Supplemental Figure 2:

**Comparative topography of training set representative CRCLM resections.** Column 1: x-ray film auto-radiography showing ApoF mRNA hepatocyte-specific in situ hybridization labeling. Column 2: Alcian Blue (AB) staining pattern in tumor tissue. Column 3: tissue topography with H&E staining. Column 4: x-ray film auto-radiography with macrophage-preferential PLTP mRNA in situ hybridization labeling. Column 5: ki-67 immunostaining indicating viable tumor cells. Column 6: Hyper-spectral spatially aware *k-means* clustering mass spectrometry imaging (MSI) data. Abbreviations: H – hepatocyte; Li – liver; M – macrophage; S – selection and T – tumor. Magnification x5.

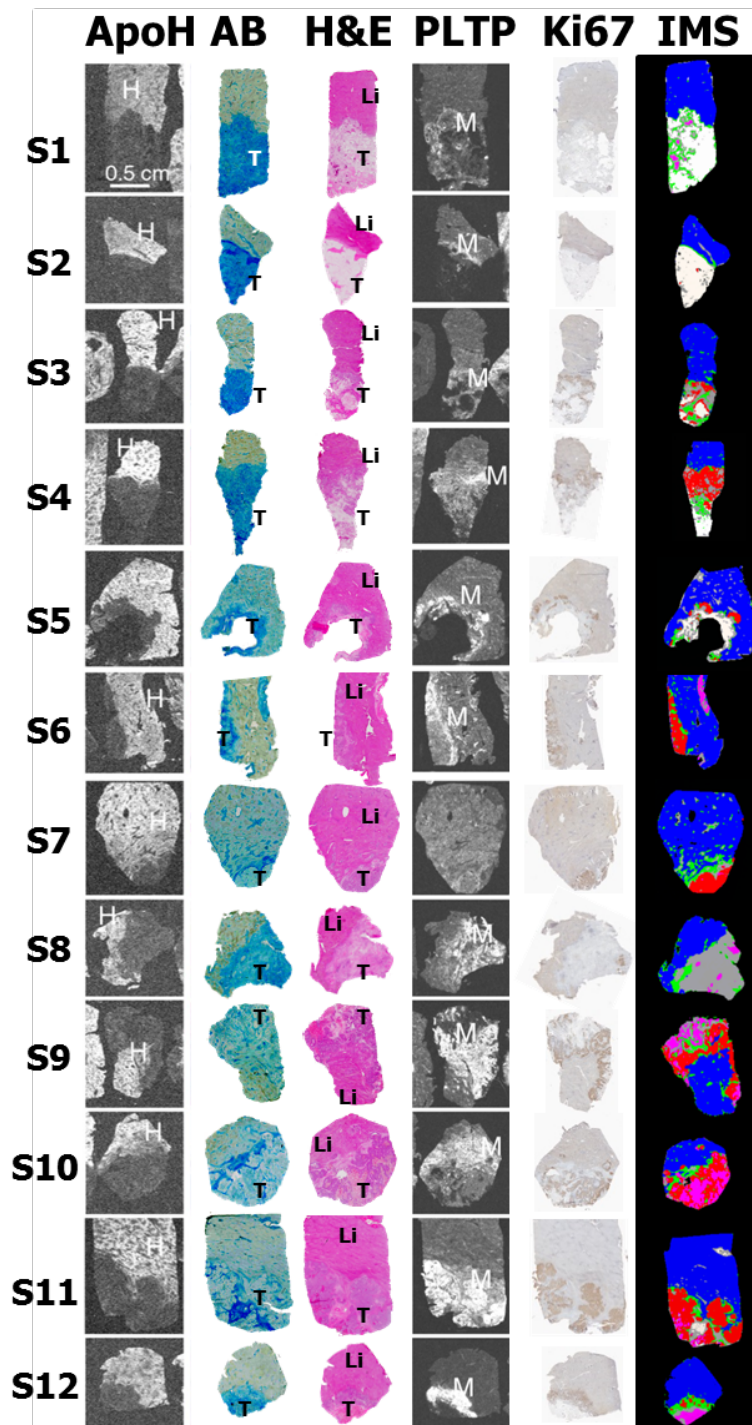

**Supplemental Figure 3: Segmentation of the MSI data for the training set.** The colors blue, red, purple, green, grey and white represent normal liver, viable tumor, necrosis, inflammation, fibrosis, and mucinous/empty/noise areas in and outside the tumor area, respectively

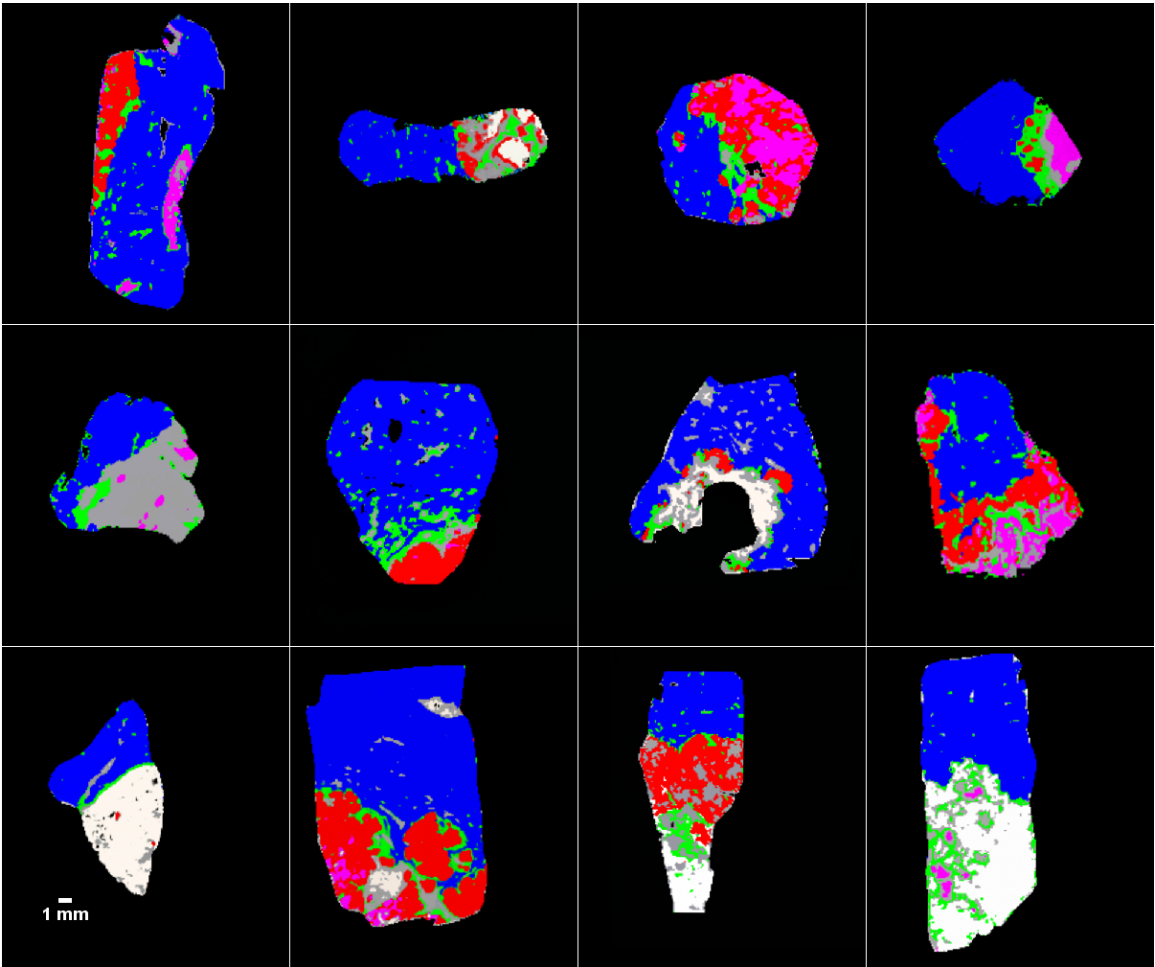

### Supplemental Figure 4:

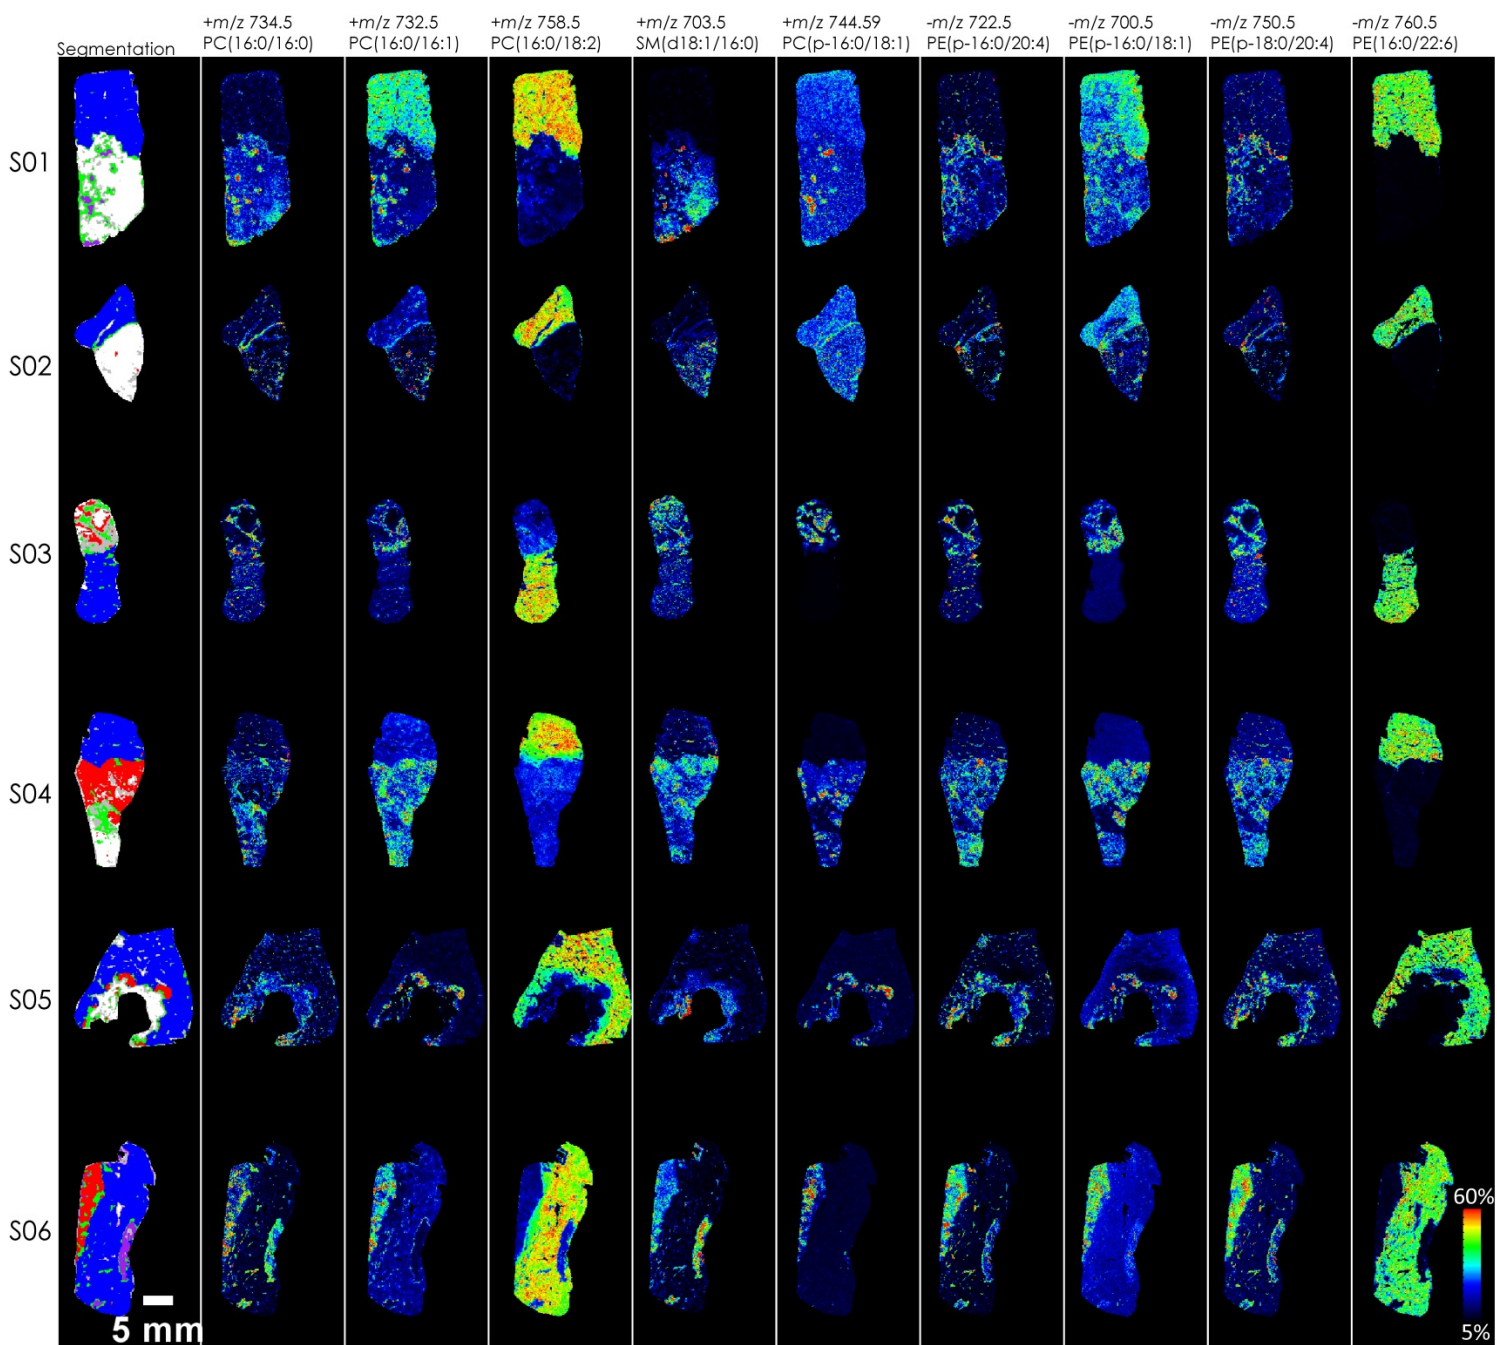

Subset of ion images of discriminant ions in training set.



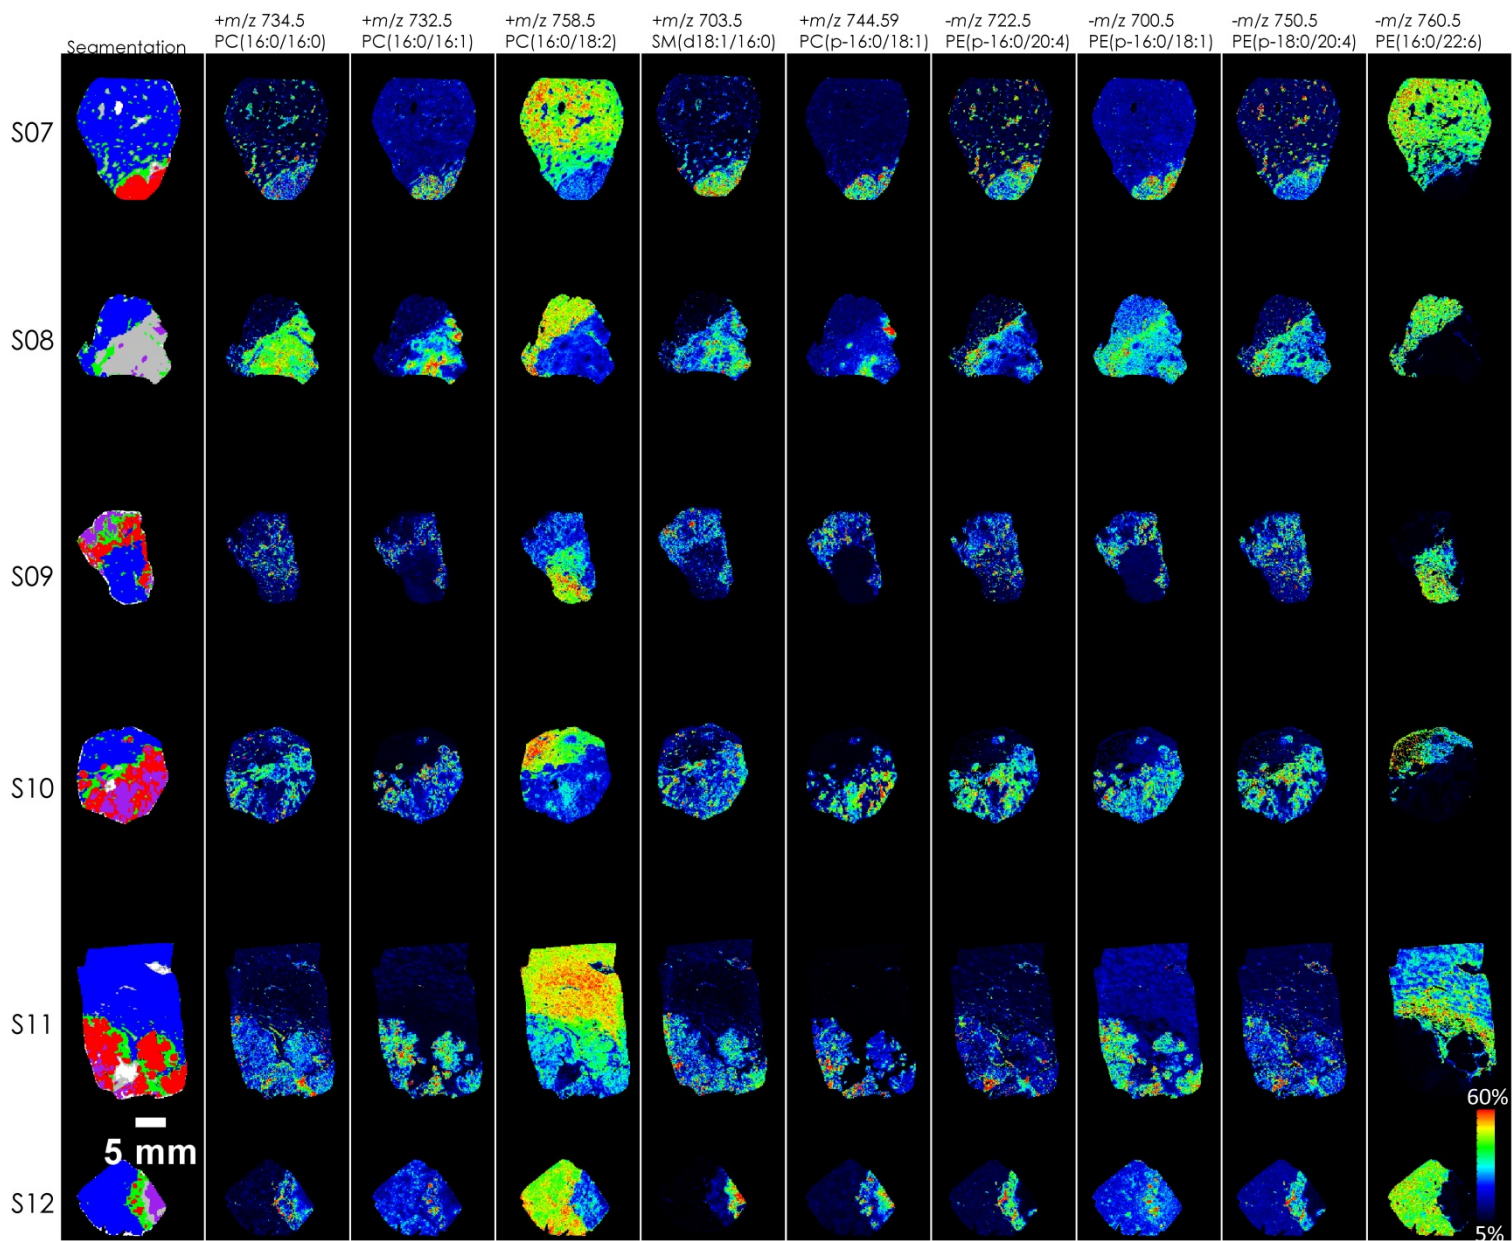

Subset of ion images of discriminant ions in training set.

## Supplemental Figure 5:

**MS/MS of most discriminant markers.** Fatty acid side chain length and number of unsaturations are given, however, side chain position at either *sn-1* or *sn-2* is not known.

### *Histology, ionization mode, theoretical mass, ion form, species*

#### I. Adjacent “Normal” Liver, Negative mode, $m/z$ 738.62 $[M-H]^-$ , PE(16:0/20:4)

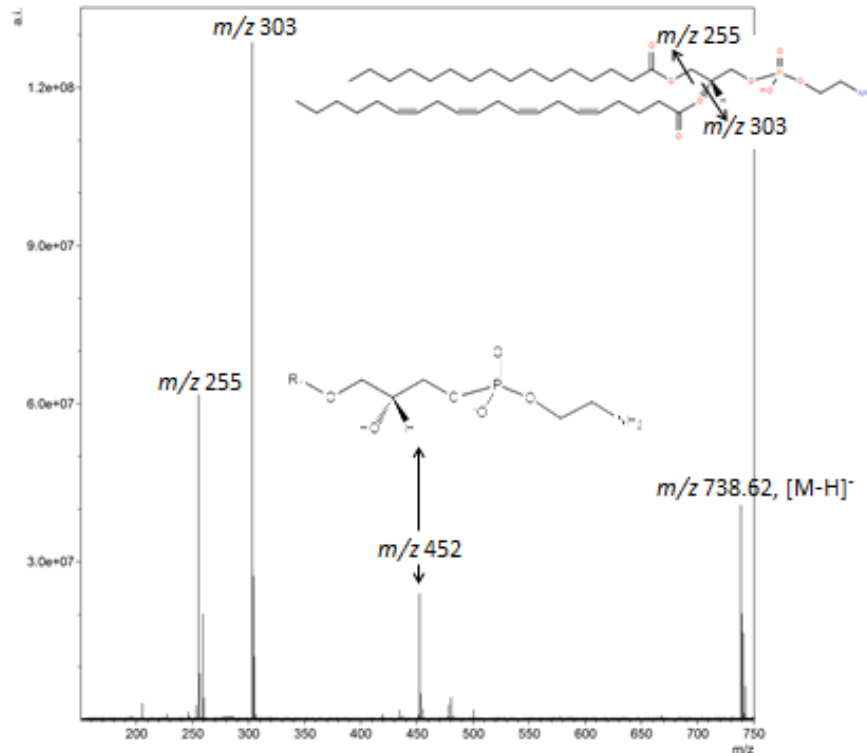

#### II. Adjacent “Normal” Liver, Negative mode, $m/z$ 762.55 $[M-H]^-$ , PE(16:0/20:4)

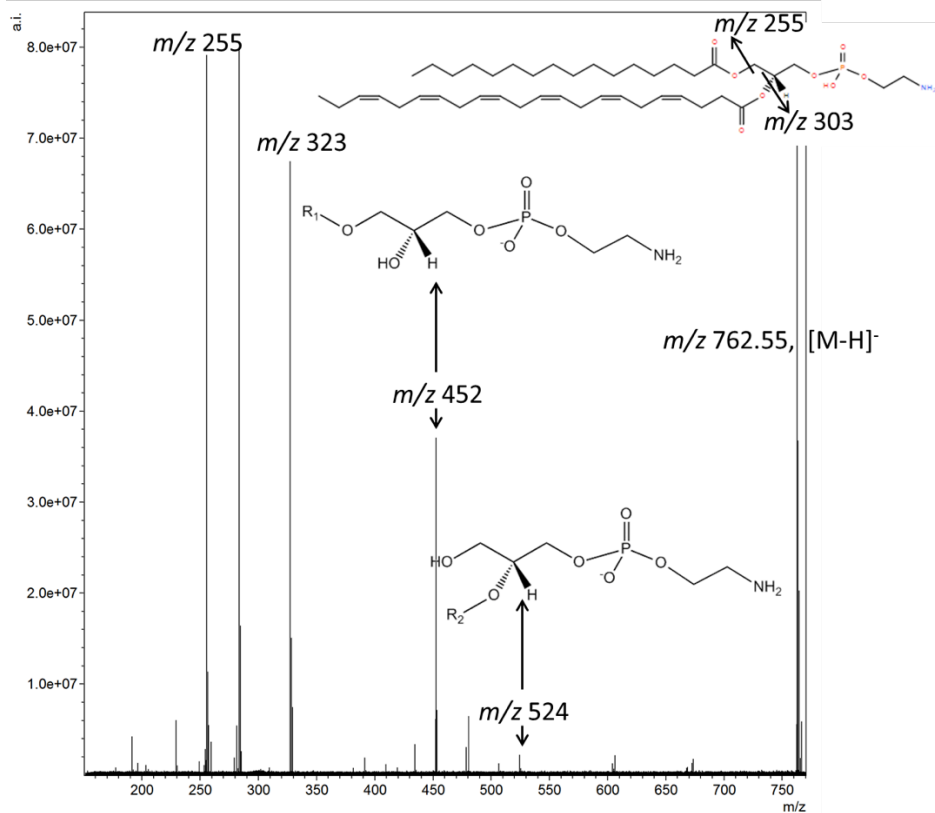

III. Adjacent “Normal” Liver, Negative mode,  $m/z$  885.56 [M-H]<sup>-</sup>, PI(18:0/20:4)

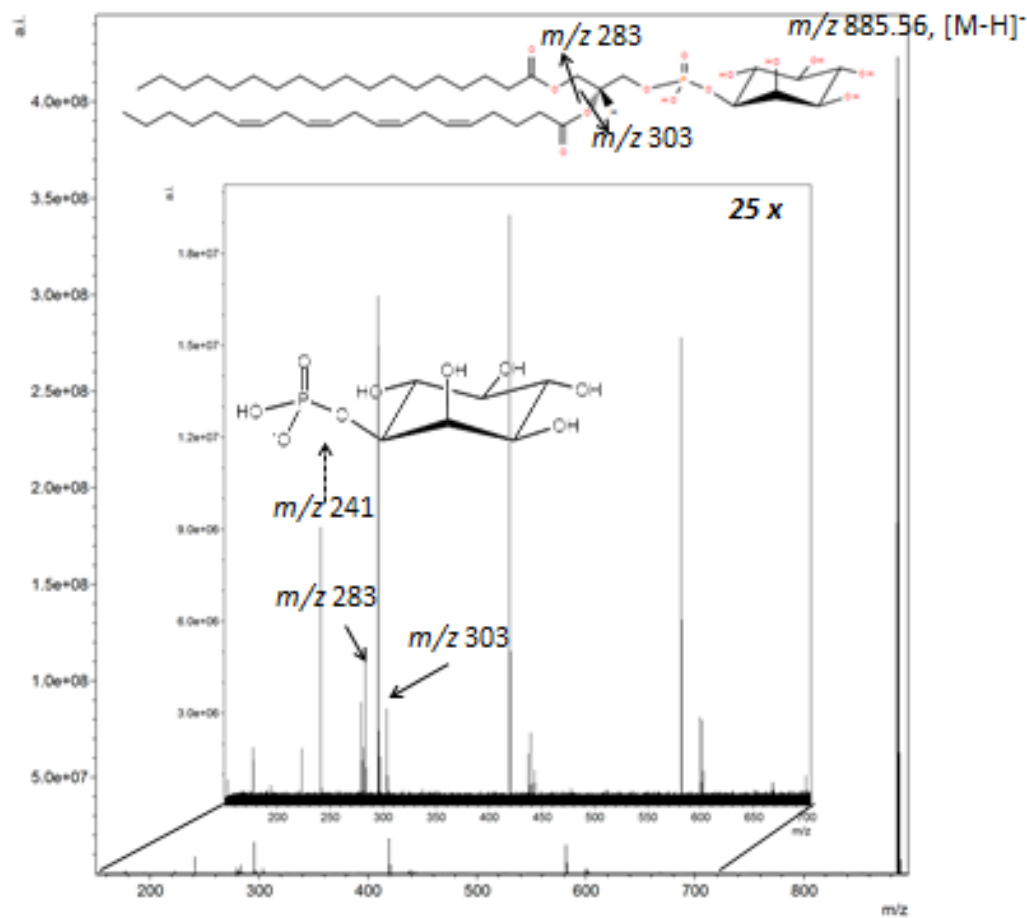

IV. Adjacent “Normal” Liver, Positive mode,  $m/z$  764.7 [M+Li]<sup>+</sup>, PC(16:0/18:2)

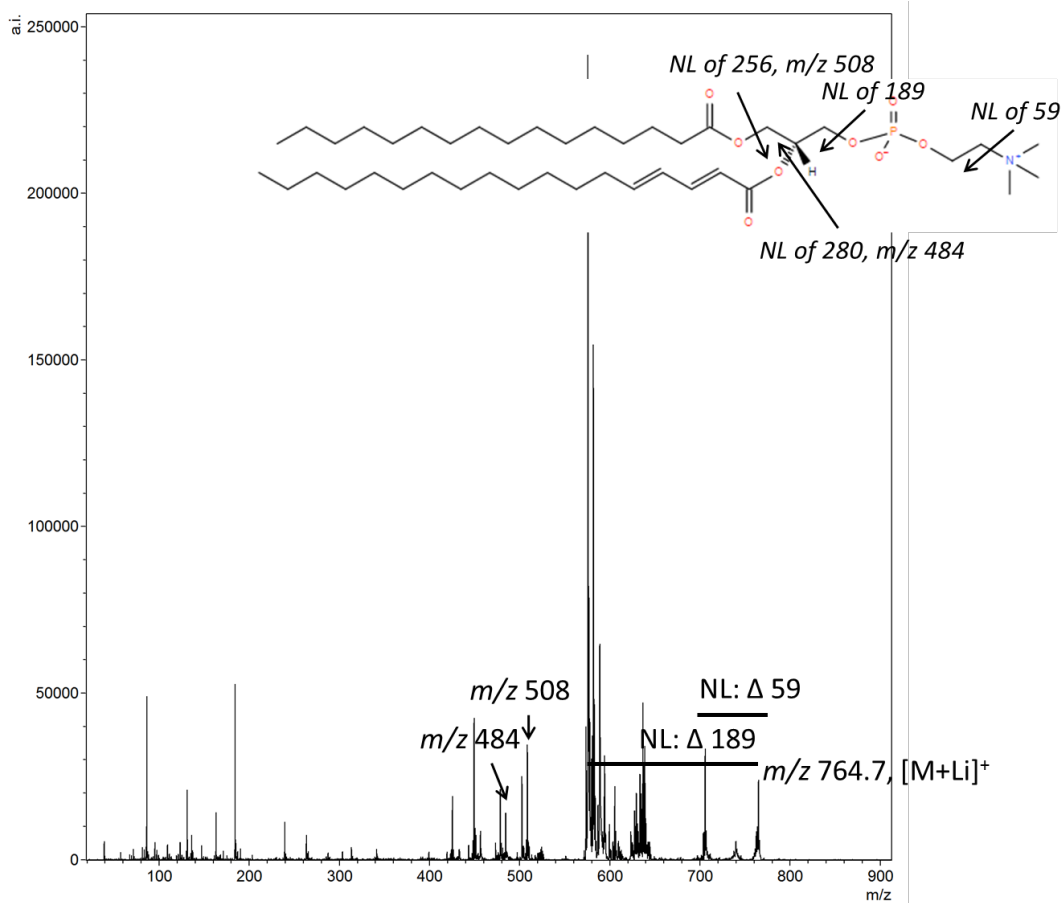

V. Viable Tumor, Negative mode,  $m/z$  698.48  $[M-H]^-$ , PE(p-16:0/18:2)

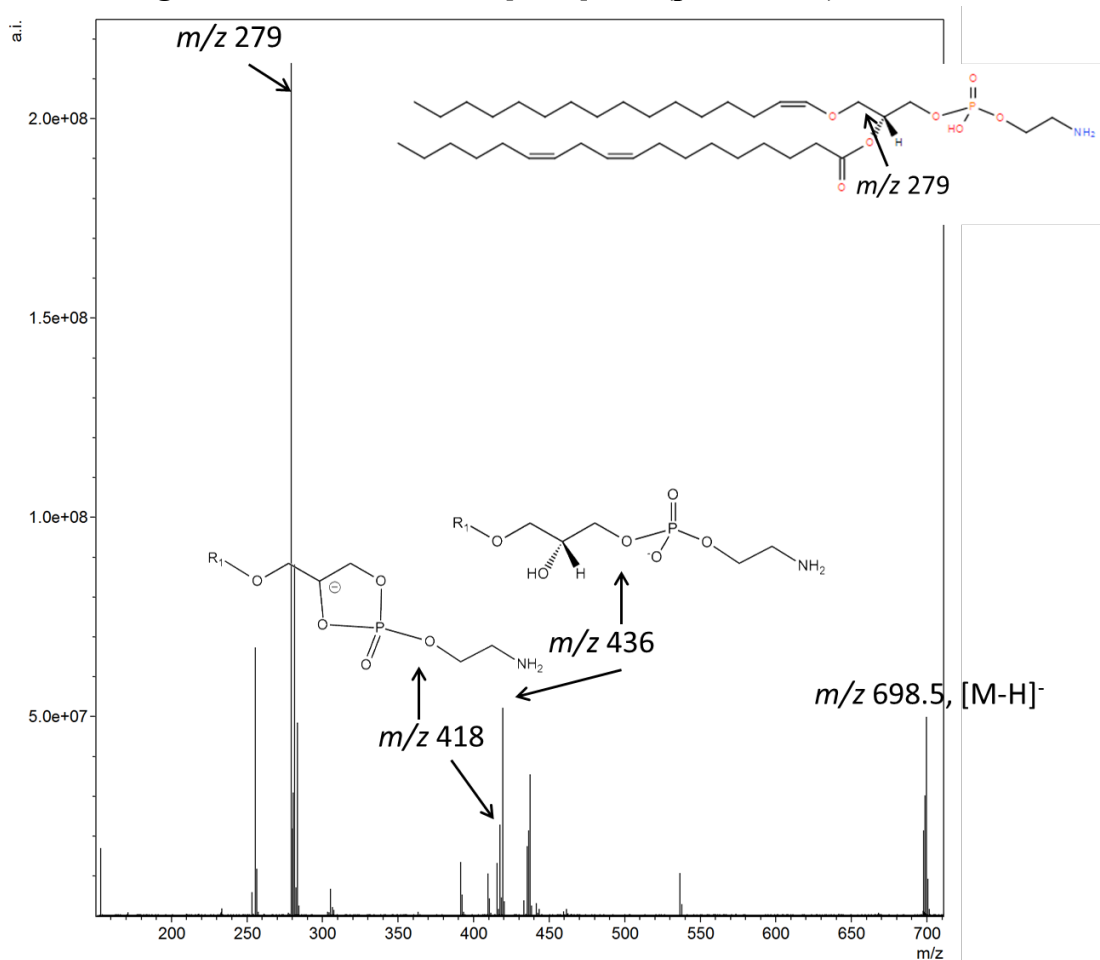

VI. Viable Tumor, Negative mode,  $m/z$  700.51  $[M-H]^-$ , PE(p-16:0/18:1)

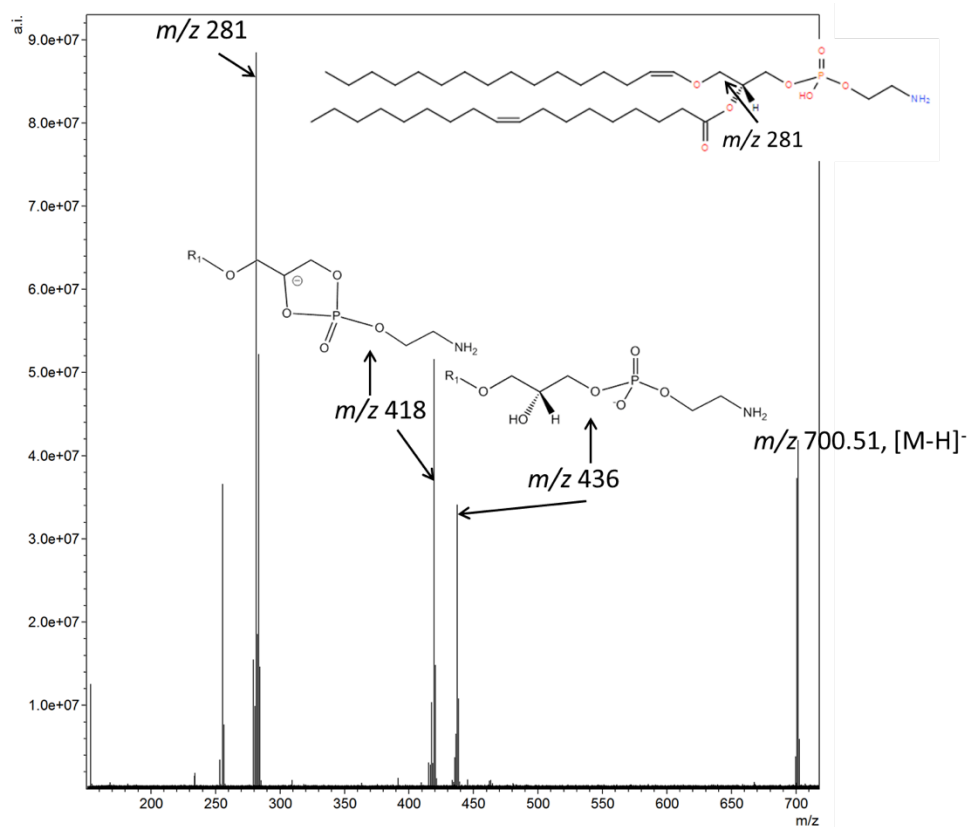

**VII. Viable Tumor, Negative mode,  $m/z$  835.53 [M-H]<sup>-</sup>, PI(16:0/18:1)**

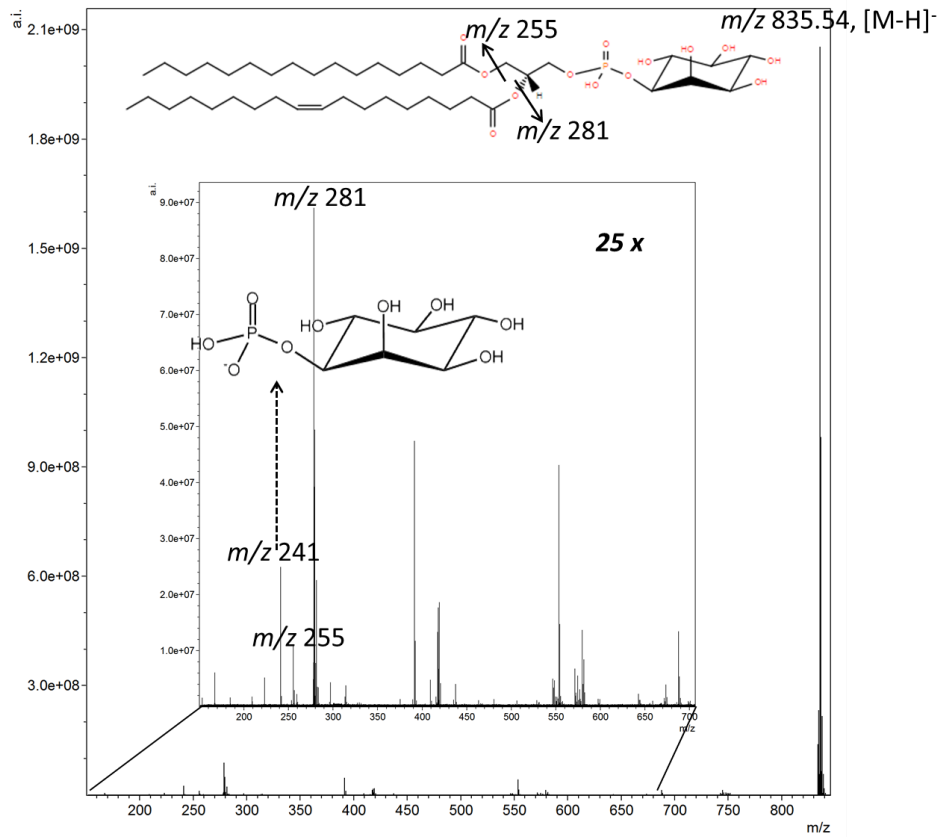

**VIII. Viable Tumor, Positive mode,  $m/z$  740.6 [M+Li]<sup>+</sup>, PC(16:0/16:1)**

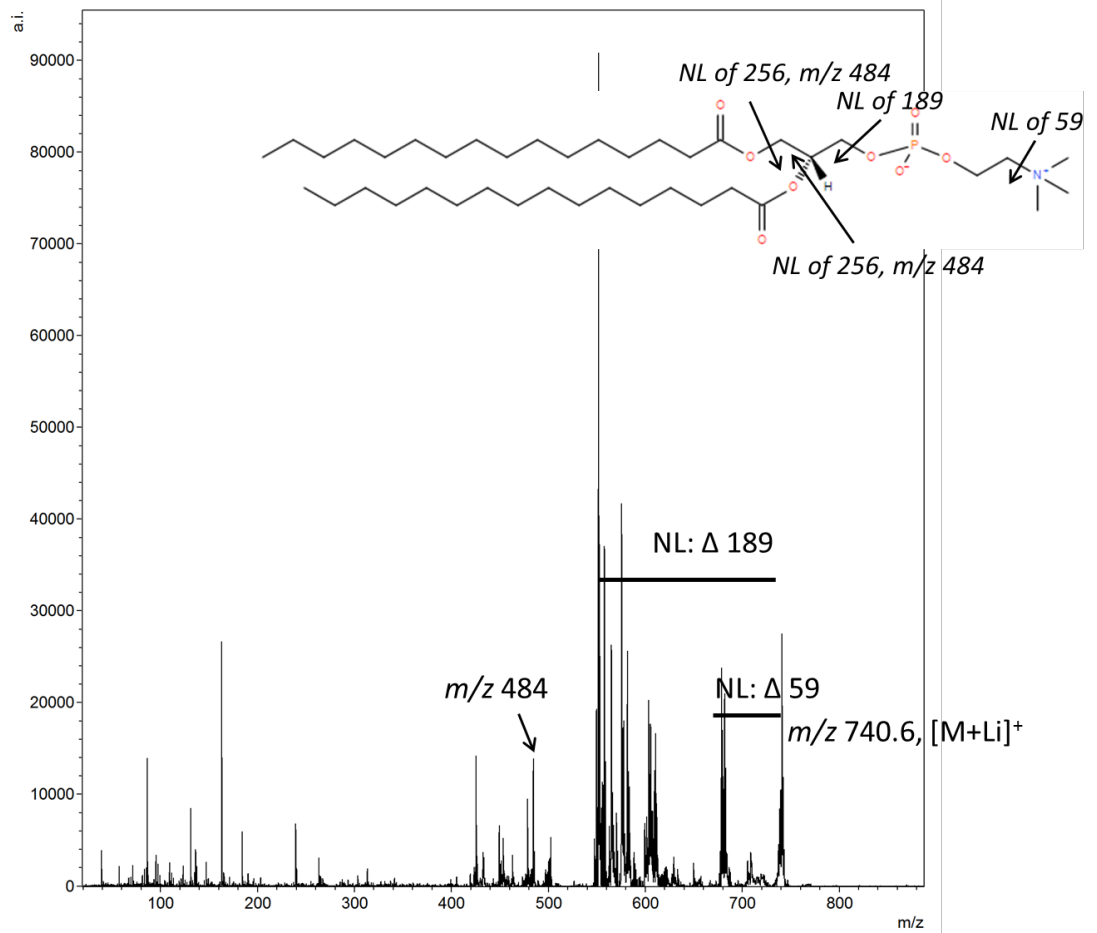

**IX. Inflammation, Negative Mode,  $m/z$  722.49 [M-H]<sup>-</sup>, PE(p-16:0/ 20:4)**

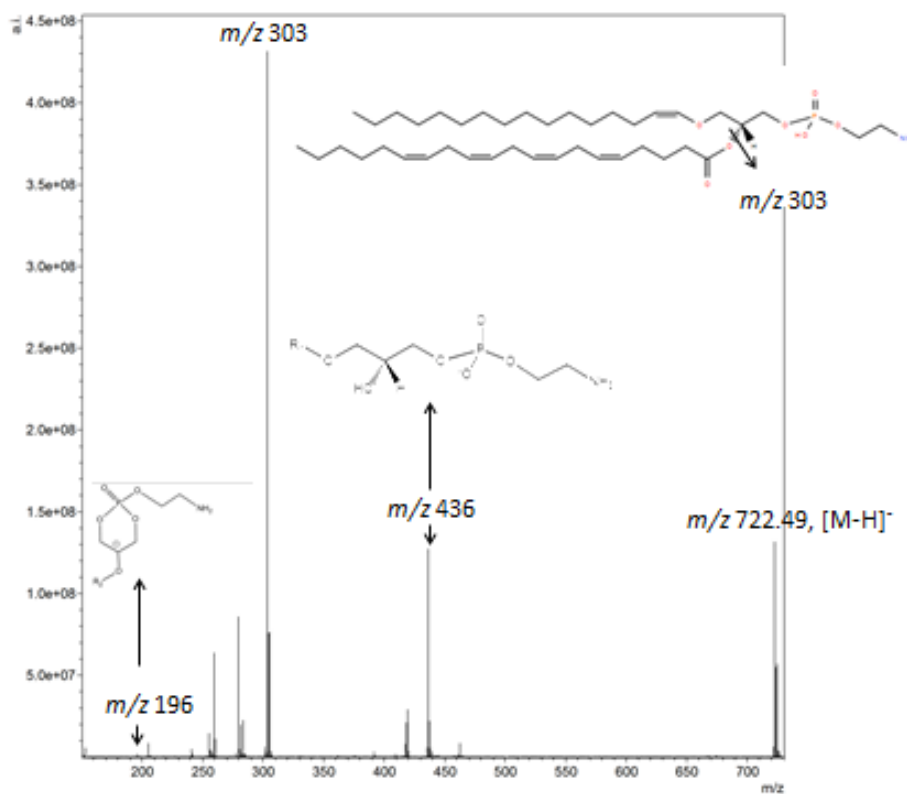

**X. Inflammation, Negative Mode,  $m/z$  750.53 [M-H]<sup>-</sup>, PE(p-18:0/ 20:4)**

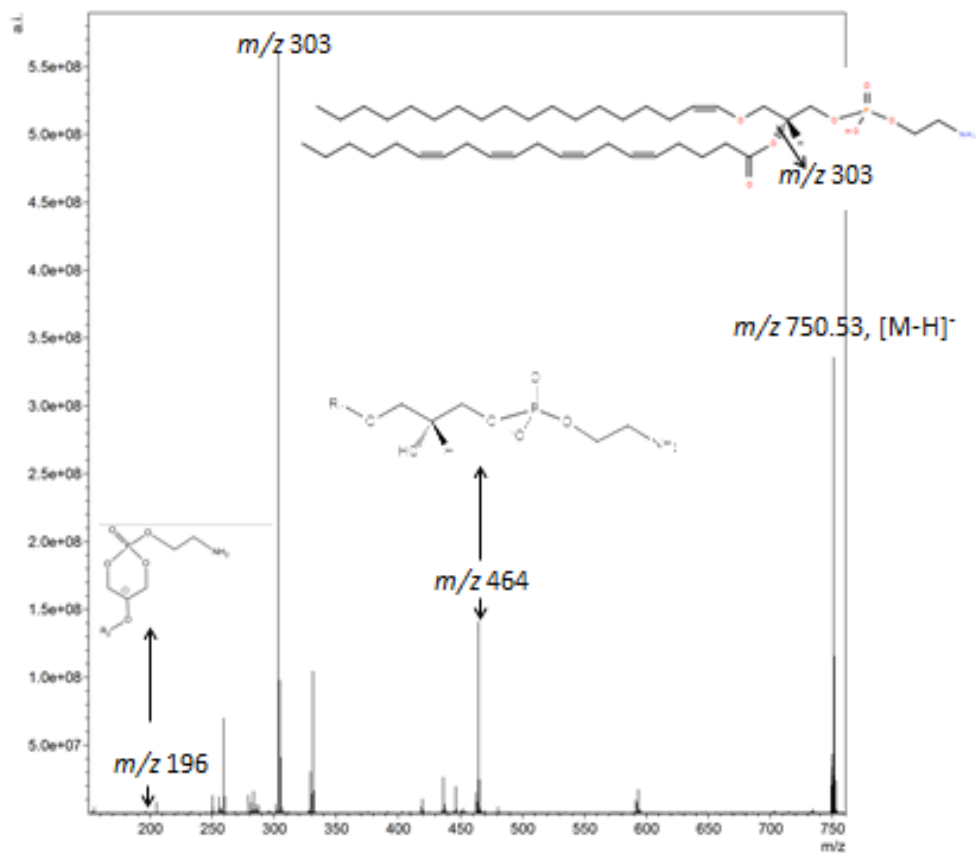

**XI. Inflammation, Positive Mode,  $m/z$  738.6  $[M + Li]^+$ , PC(16:0/ 16:0)**

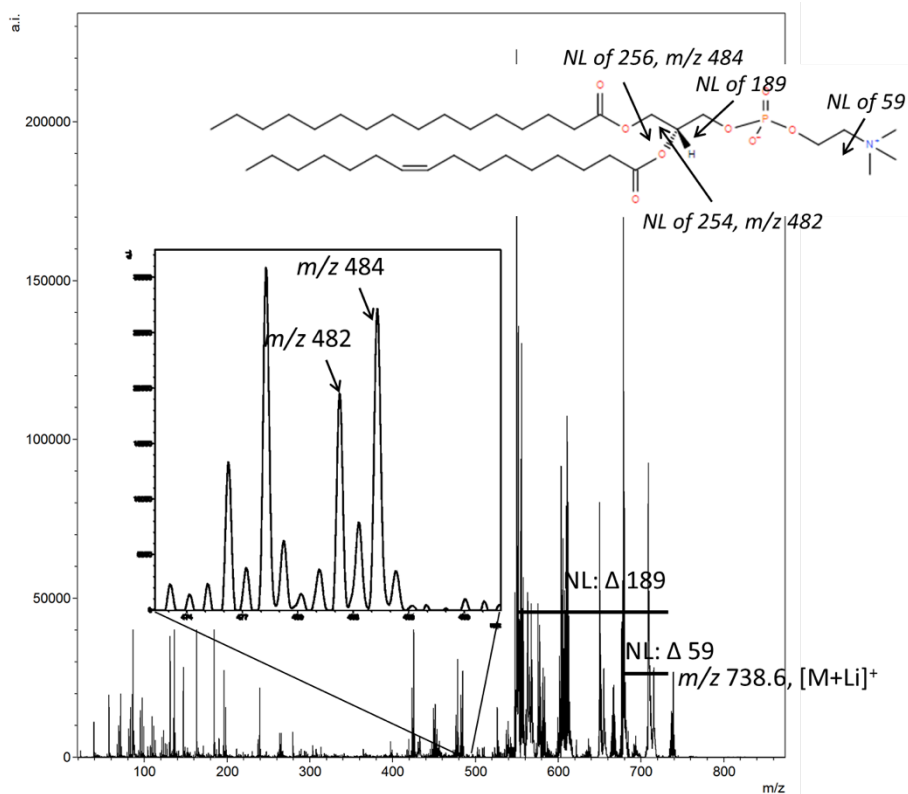

**XII. Necrosis, Positive Mode,  $m/z$  709.6  $[M + Li]^+$ , SM(d18:1/16:0)**

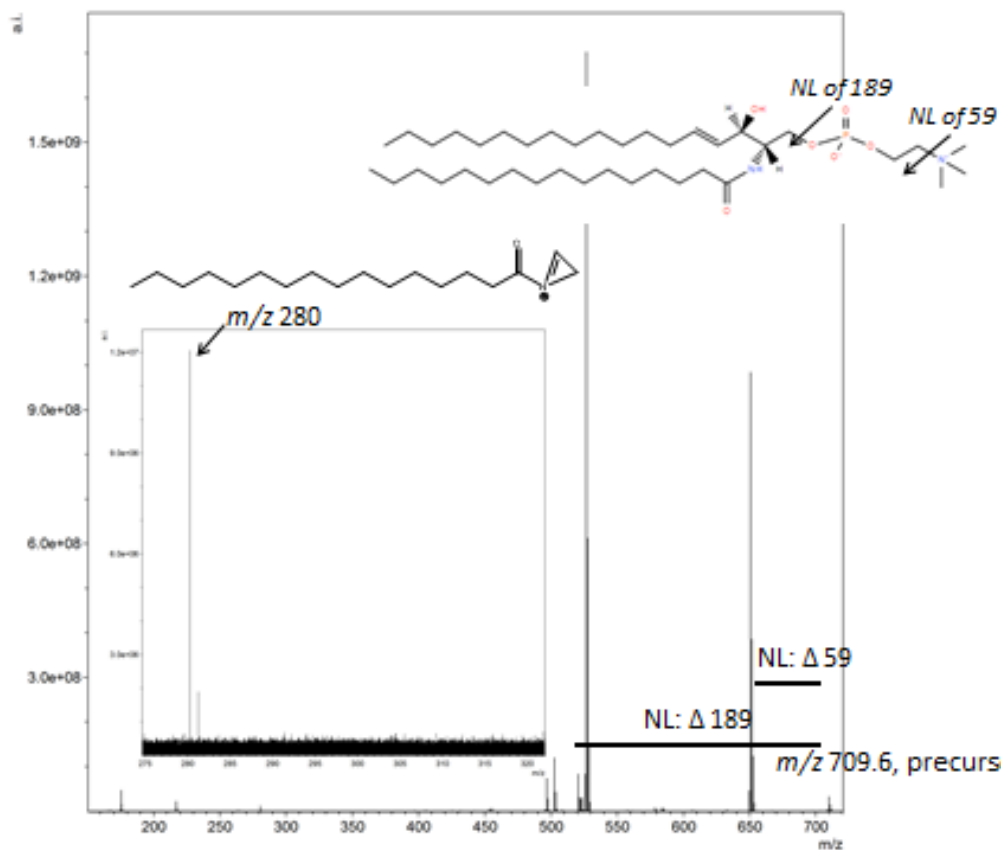

**Supplemental Figure 6: MSI-H&E staining correlation for validation**

**Predictive MSI on testing set of CRC samples.** (a) For all samples, a is the predicted MSI data at 100  $\mu\text{m}$ . (b) large scale view of H&E staining of serial section. (c-d) zoom views of H&E for comparison.

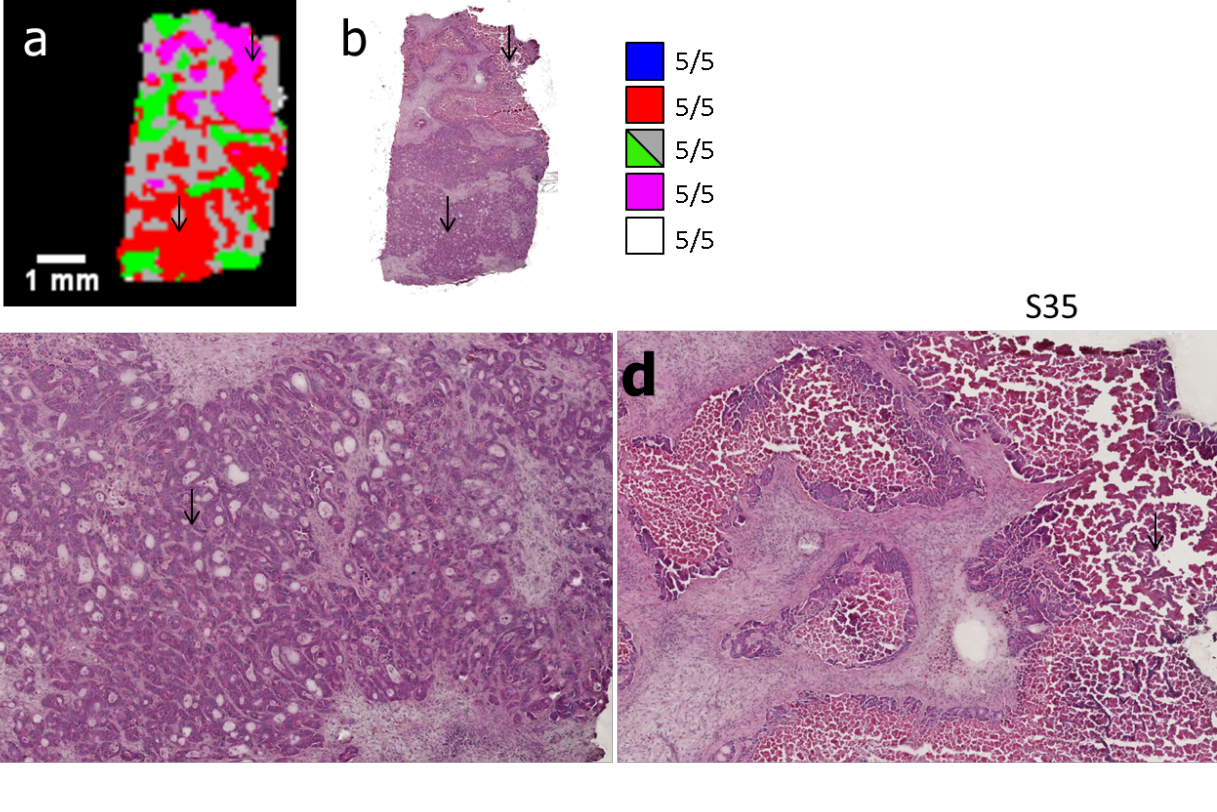



a

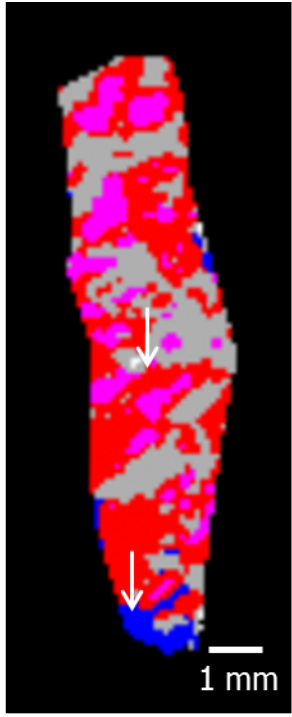

b

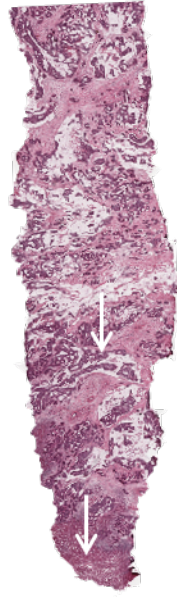

S36

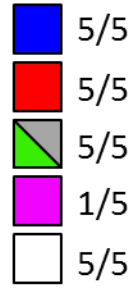

c

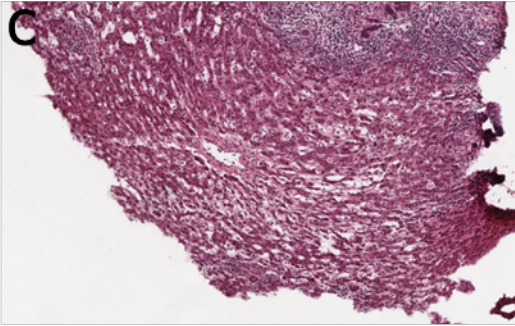

d

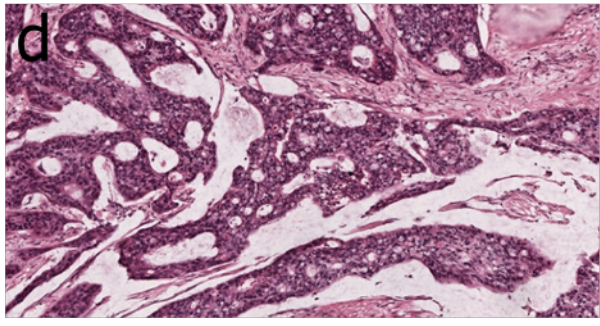

a

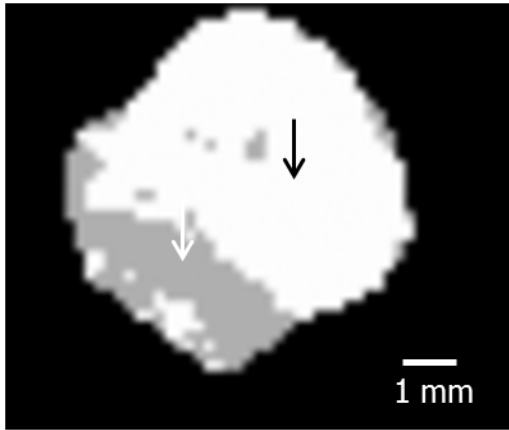

b

S37

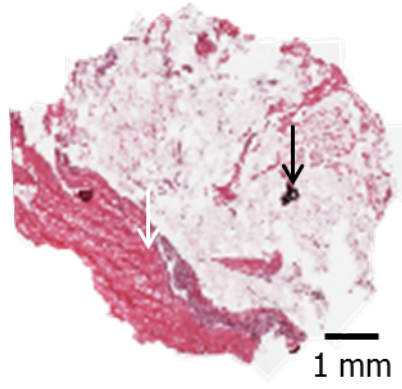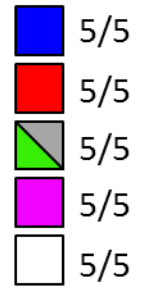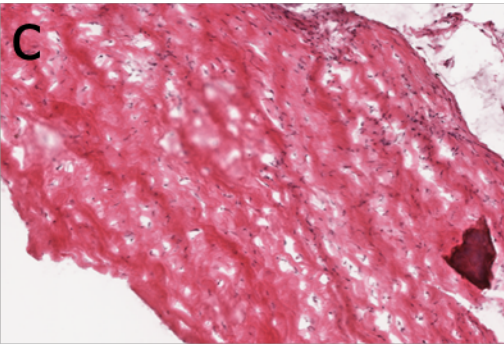

0.1 mm

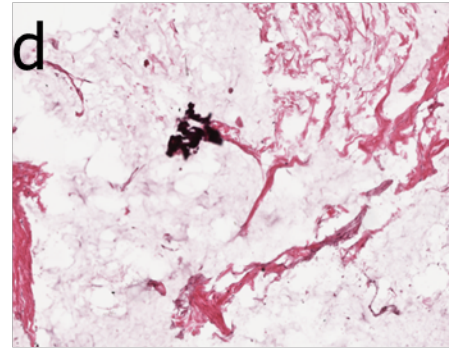

0.1 mm

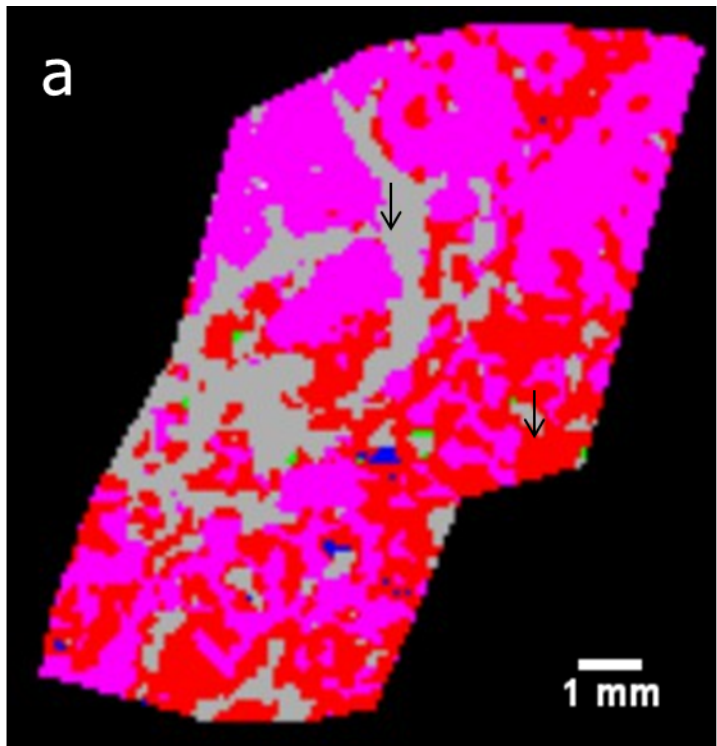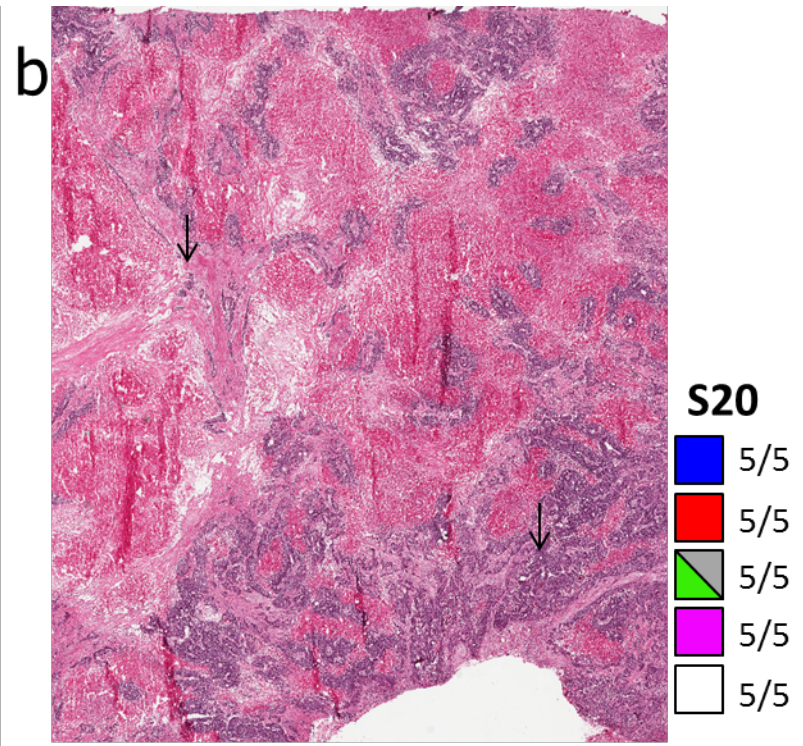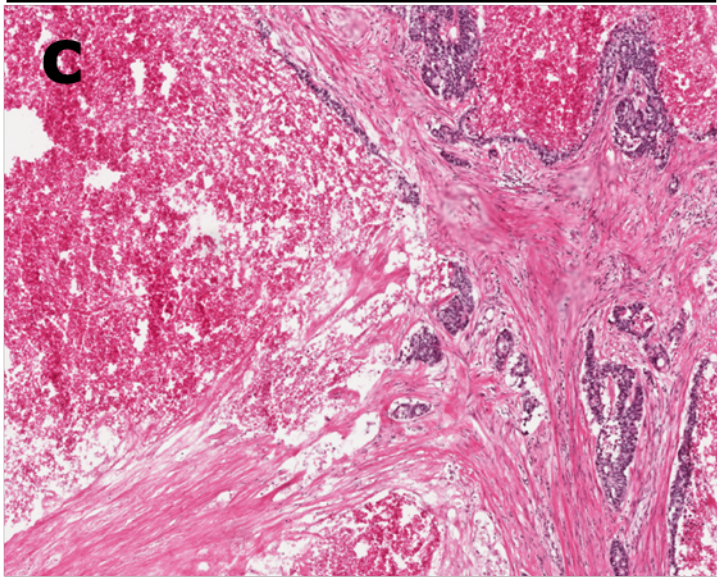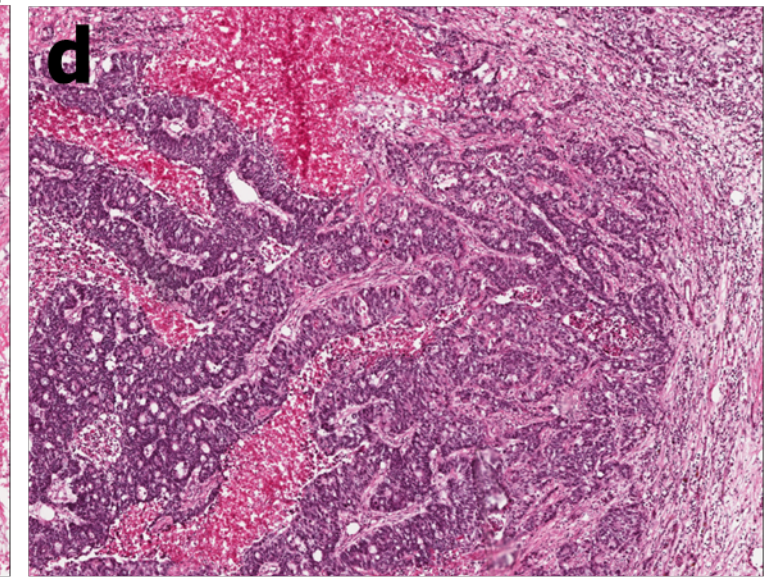

0.5 mm

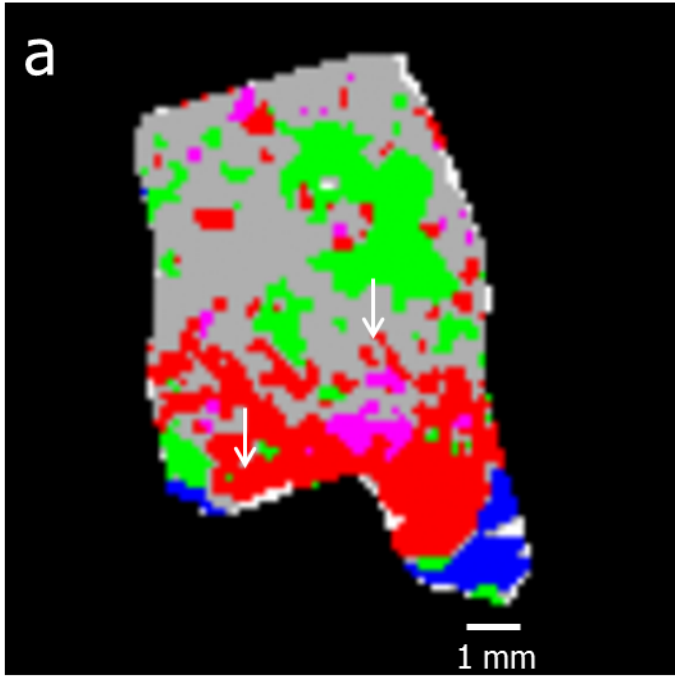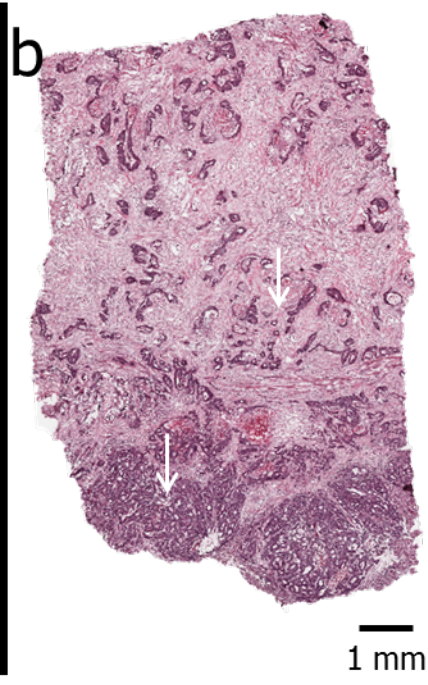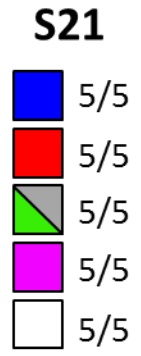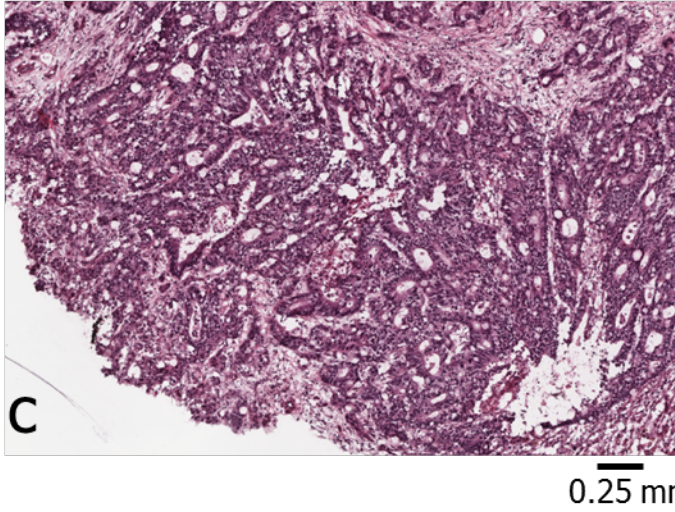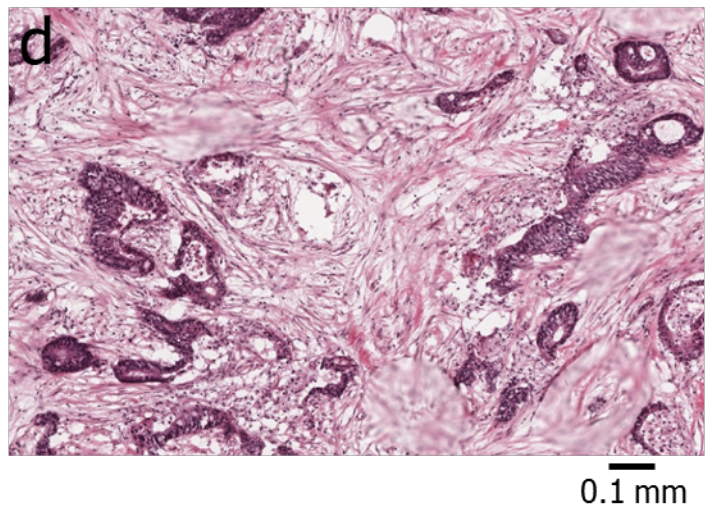

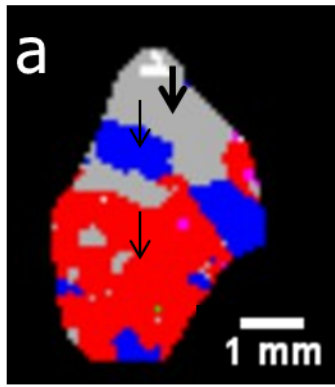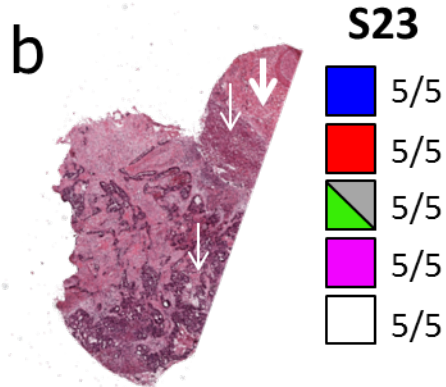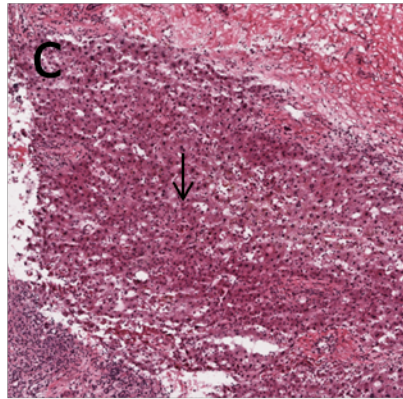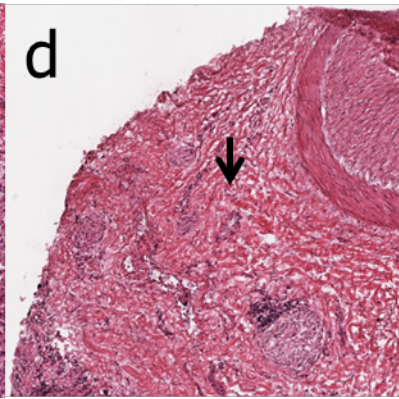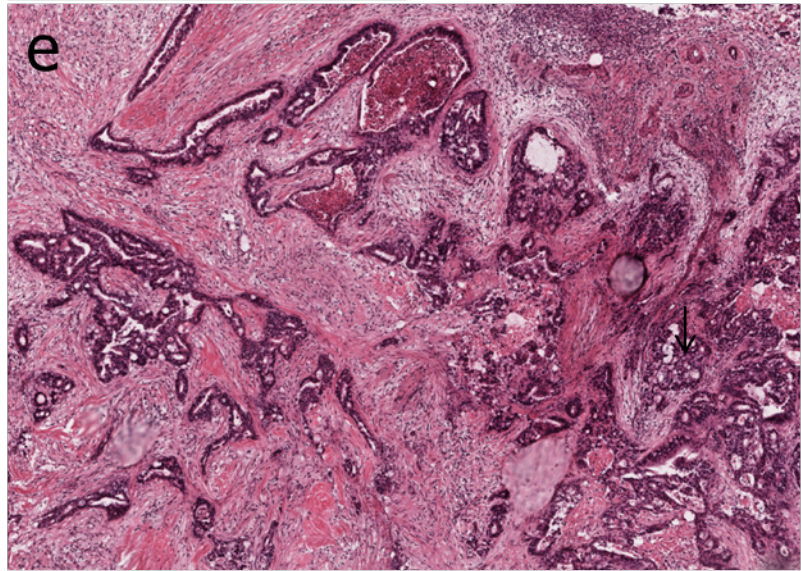

0.5 mm

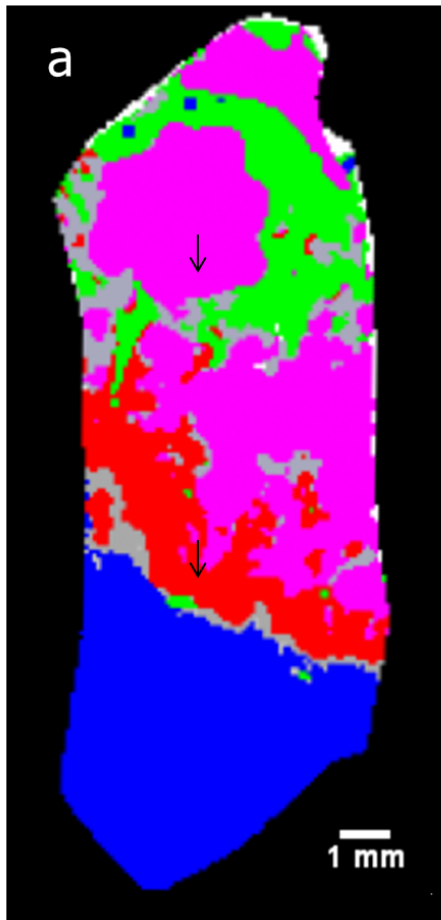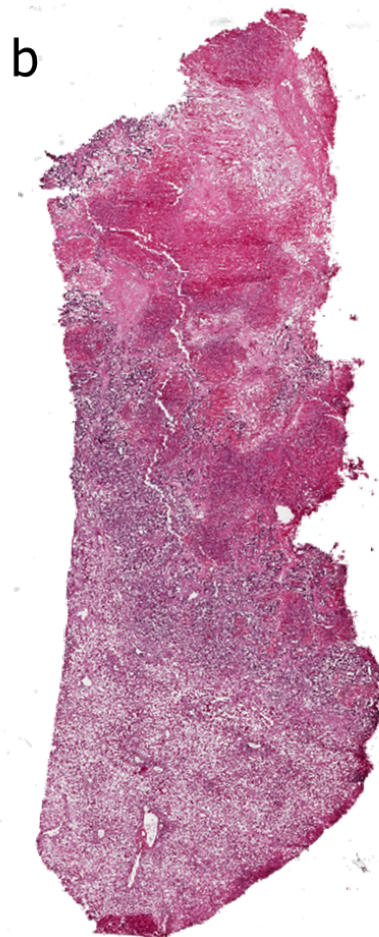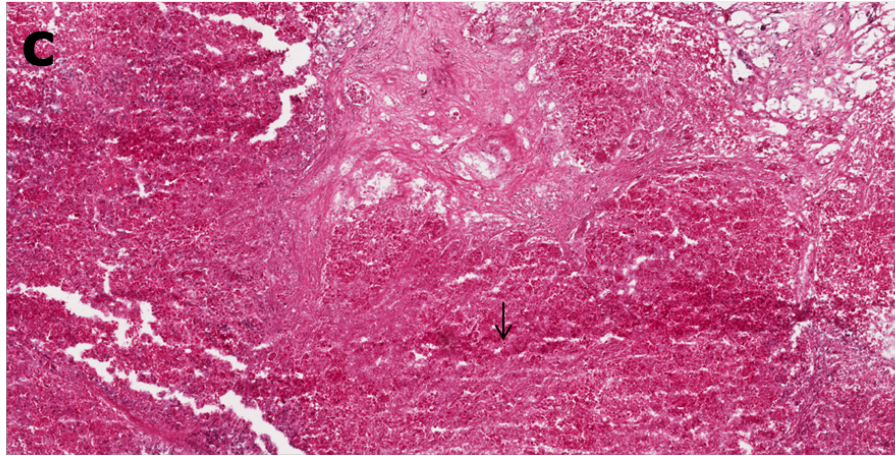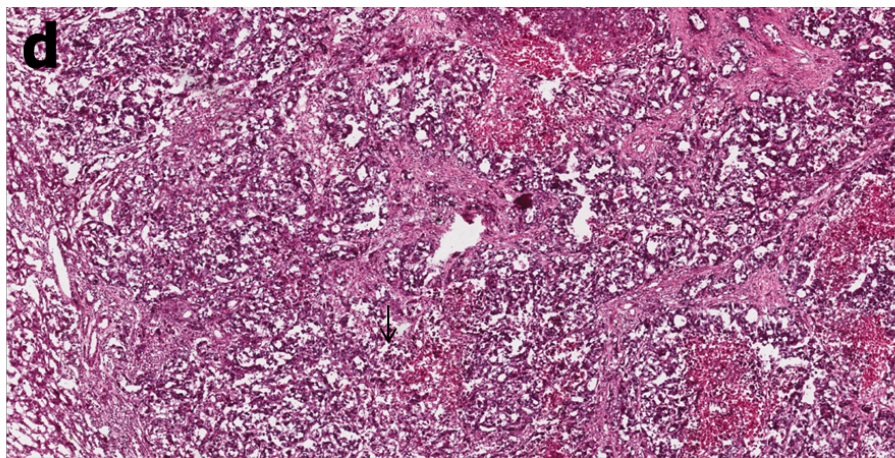

**S26**

-  5/5
-  5/5
-  5/5
-  5/5
-  5/5

0.5 mm

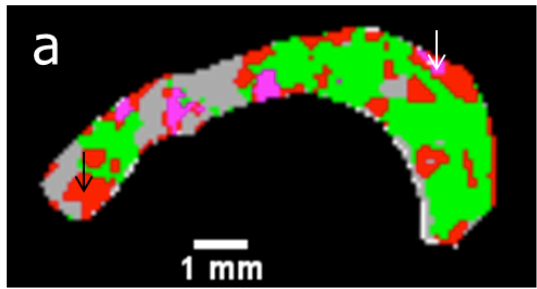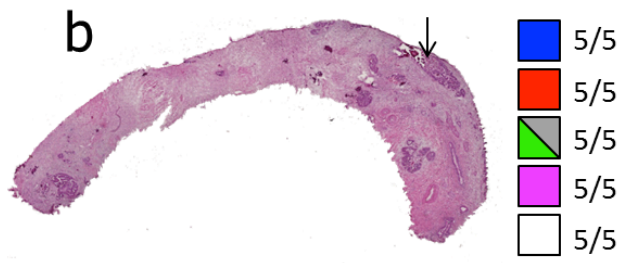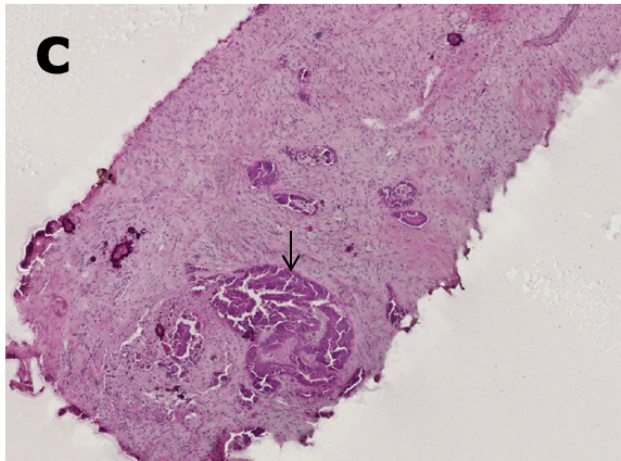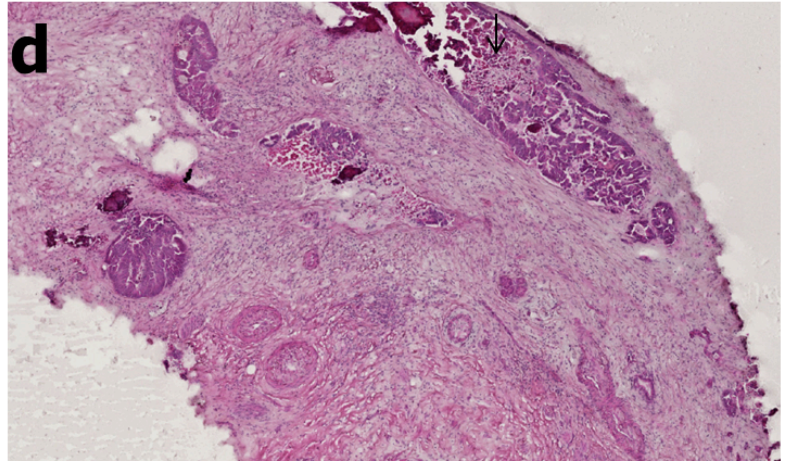

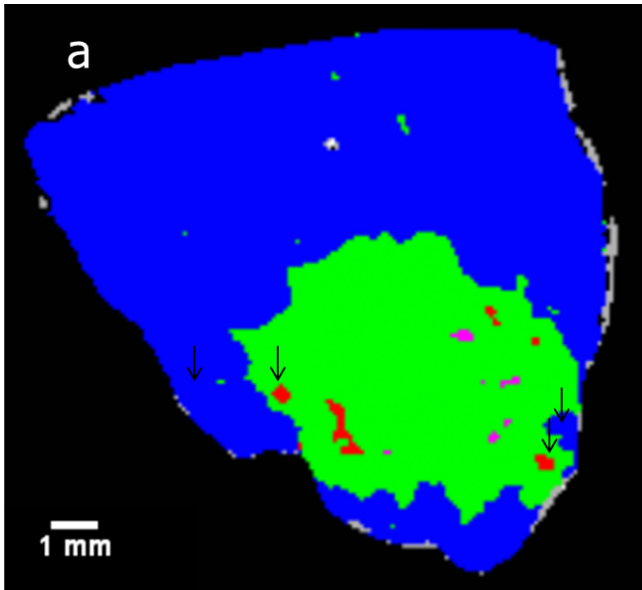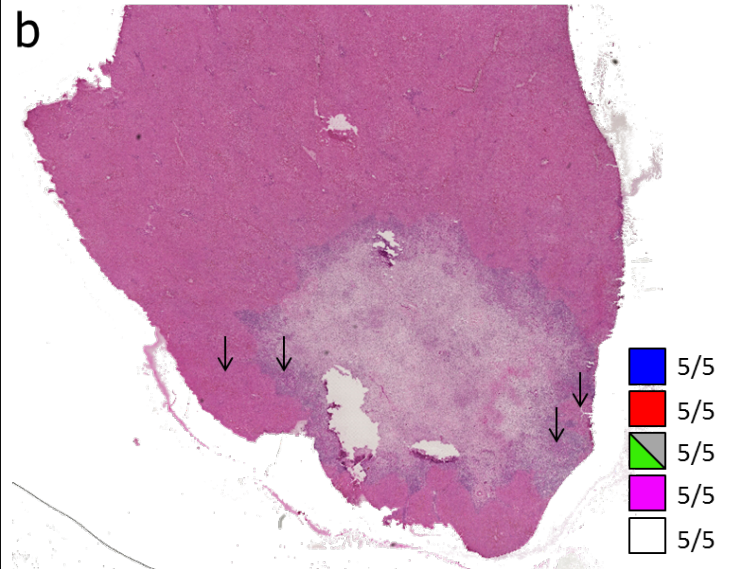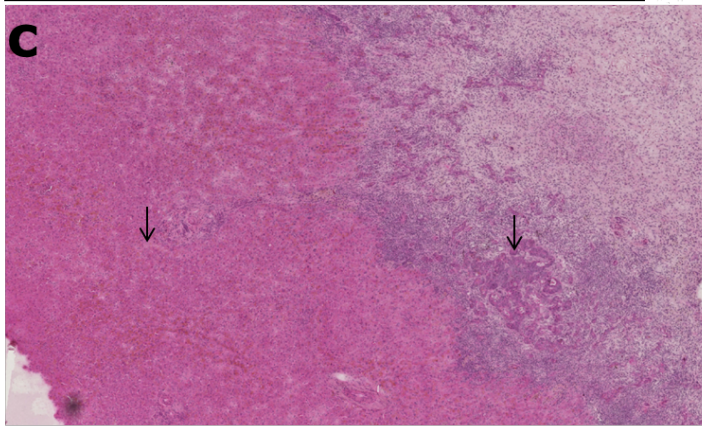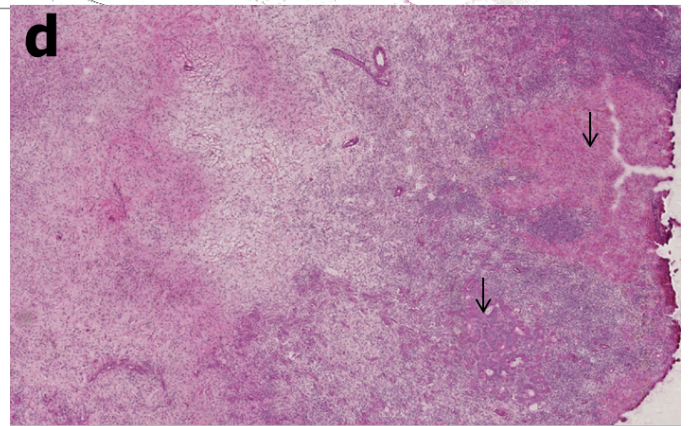

0.5 mm



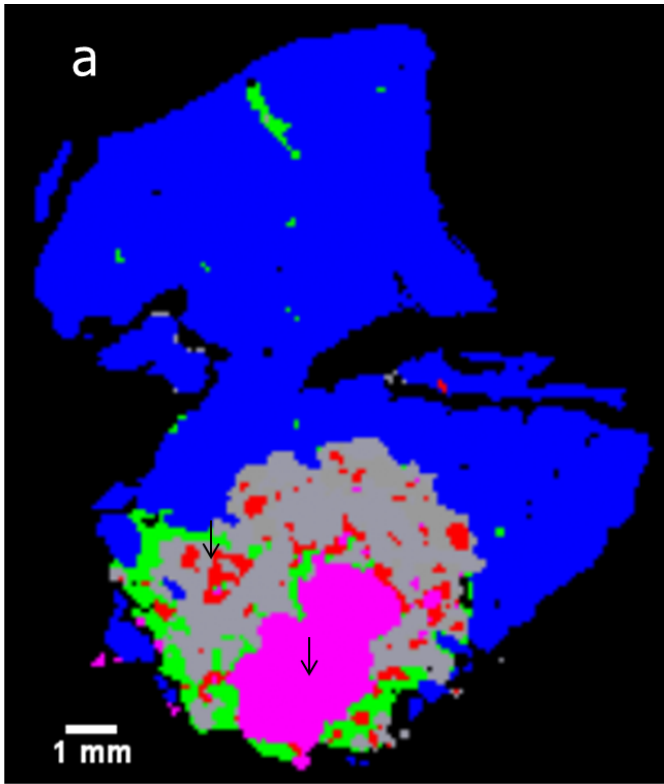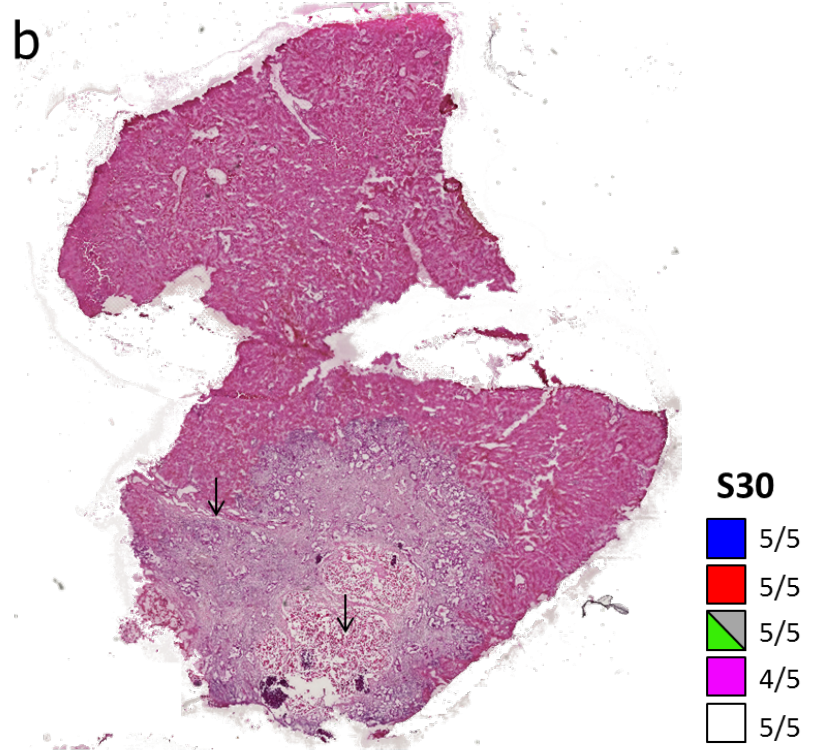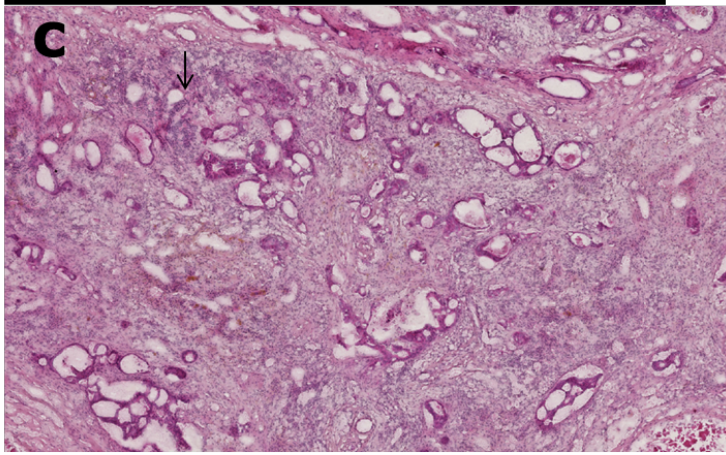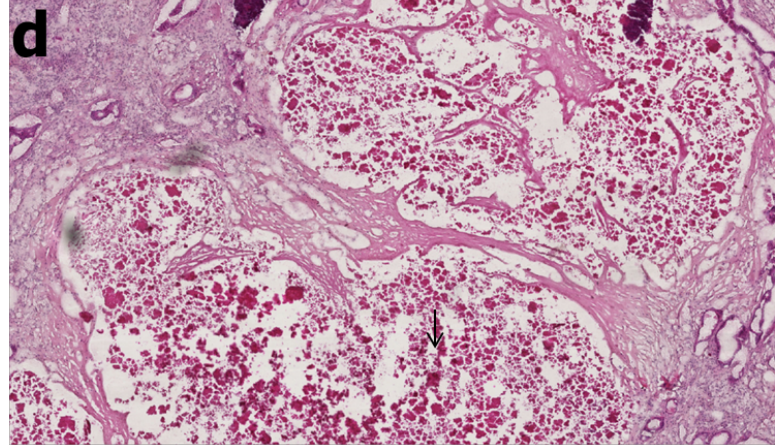

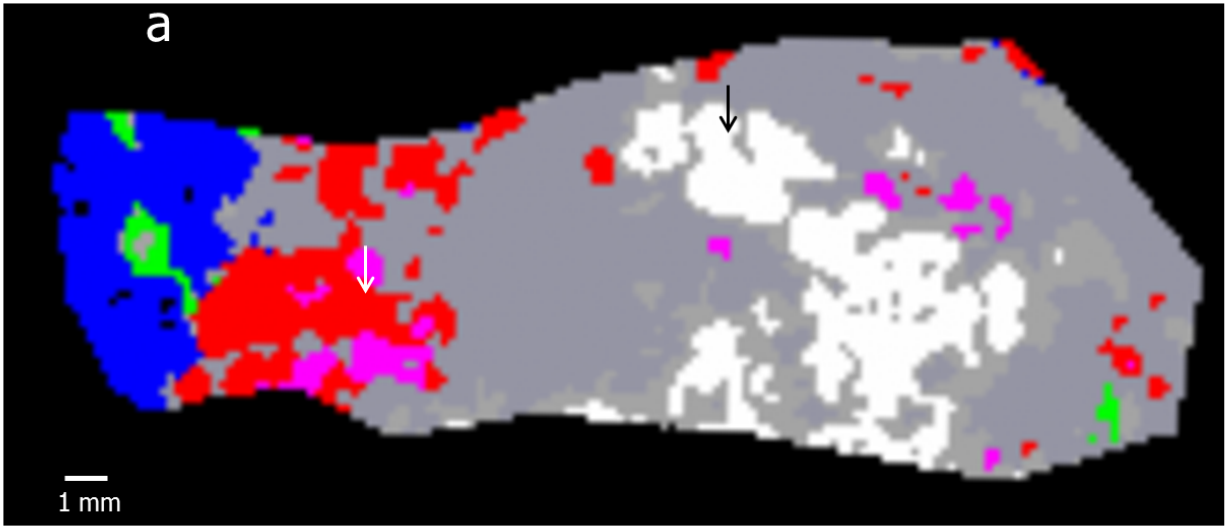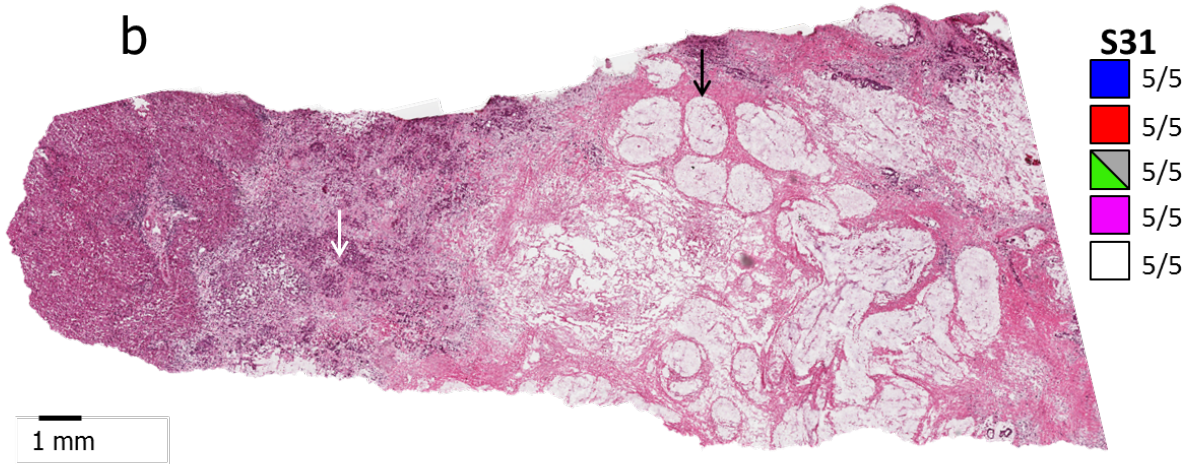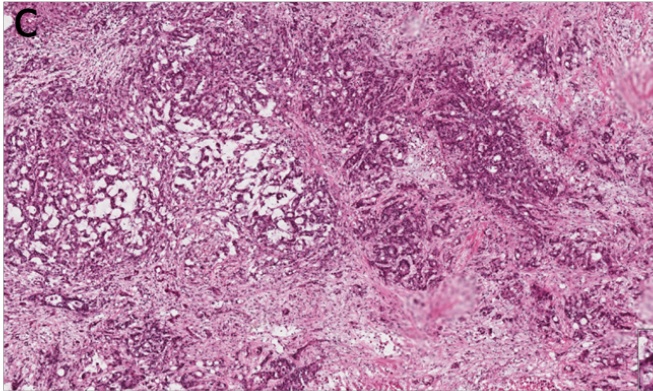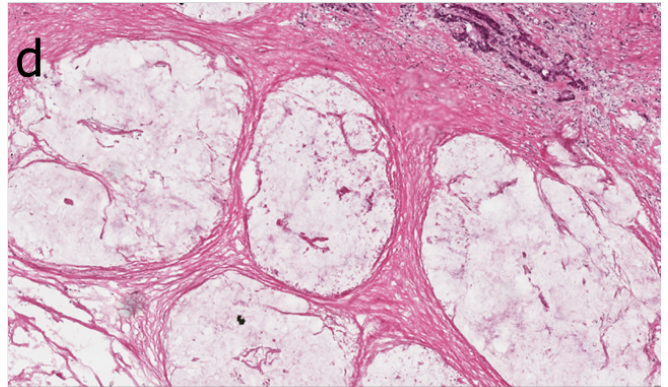

0.1 mm

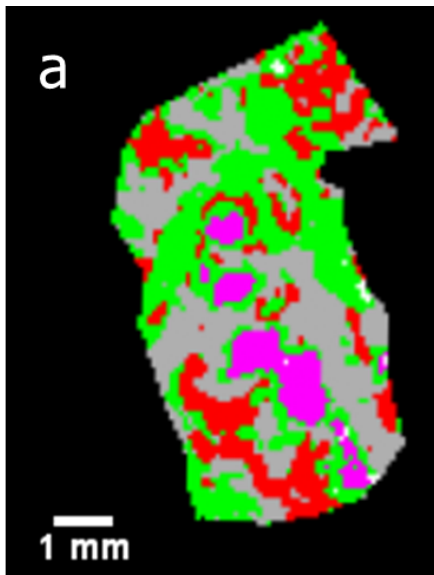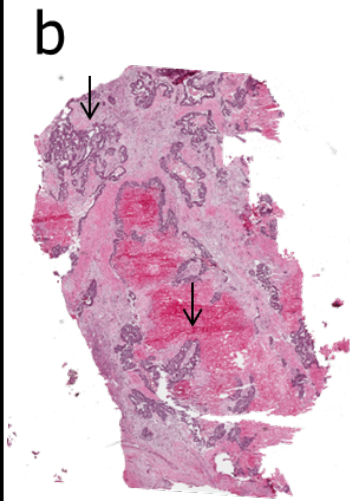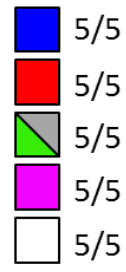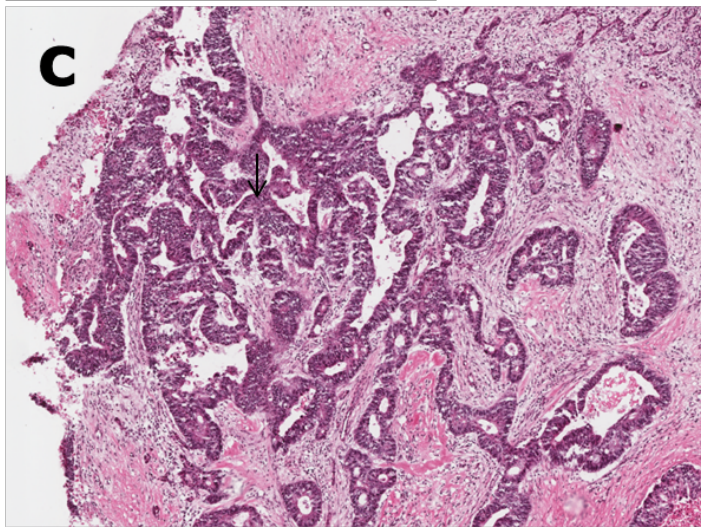

0.5 mm

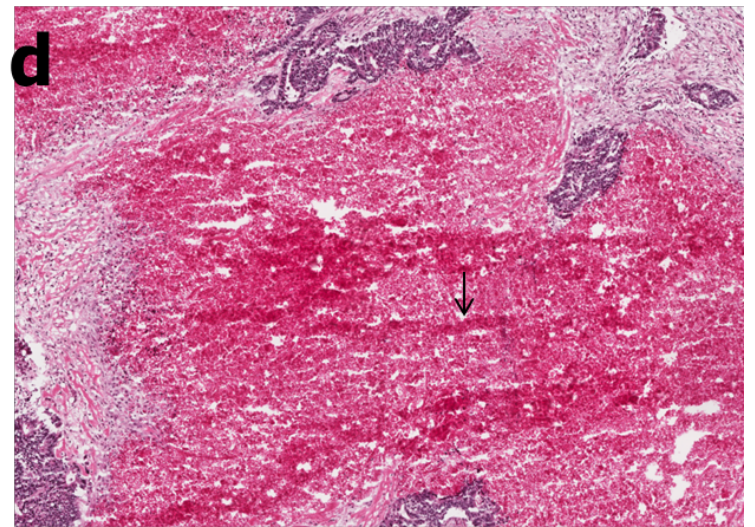

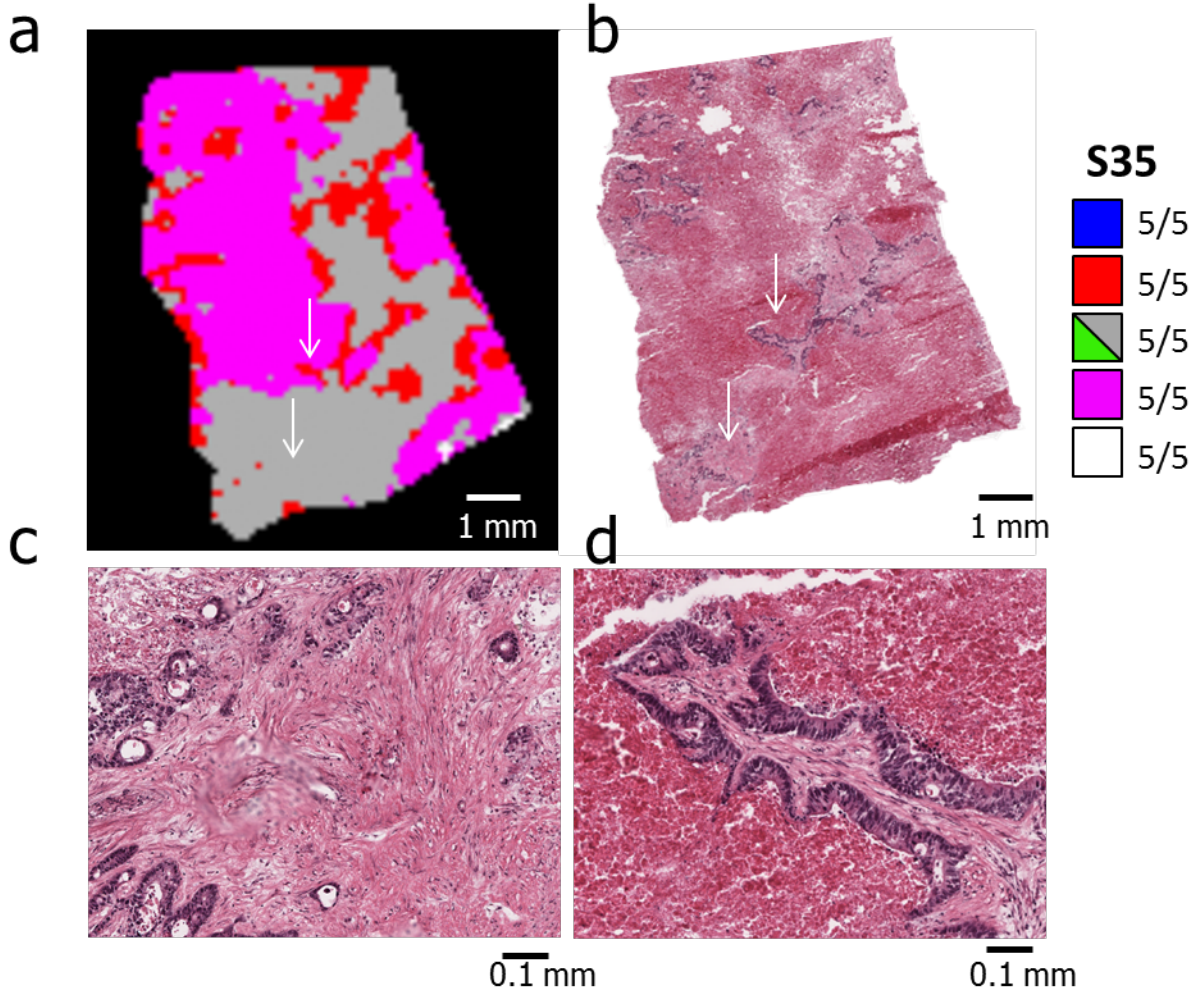

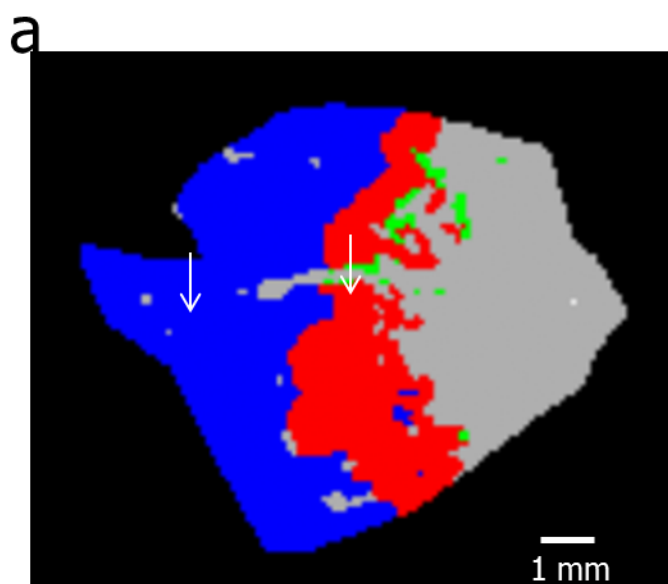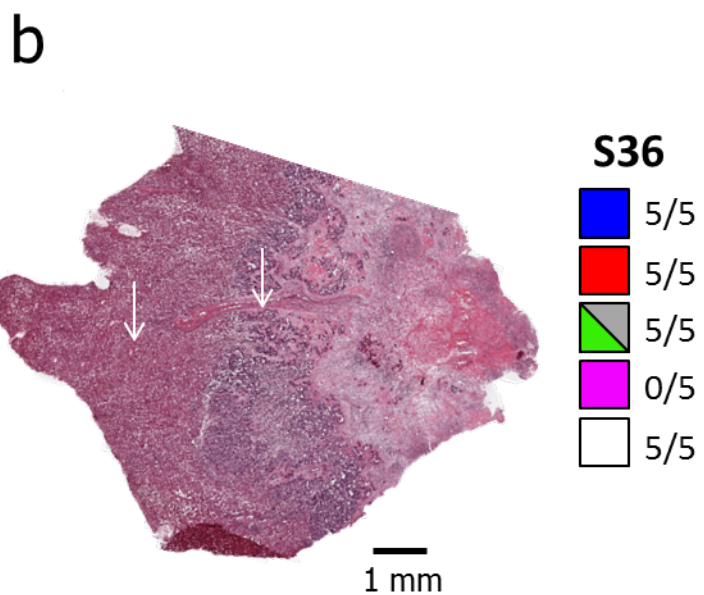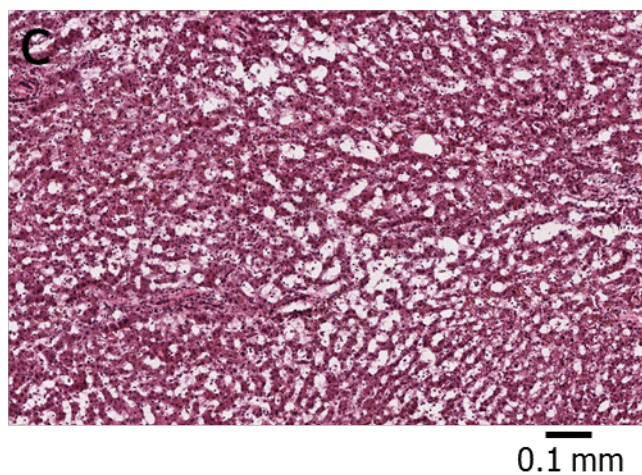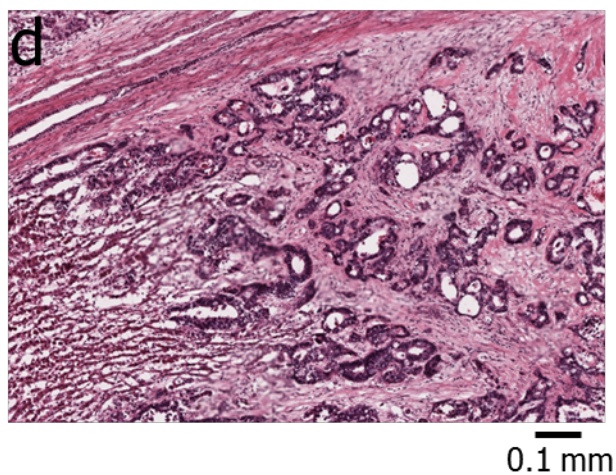

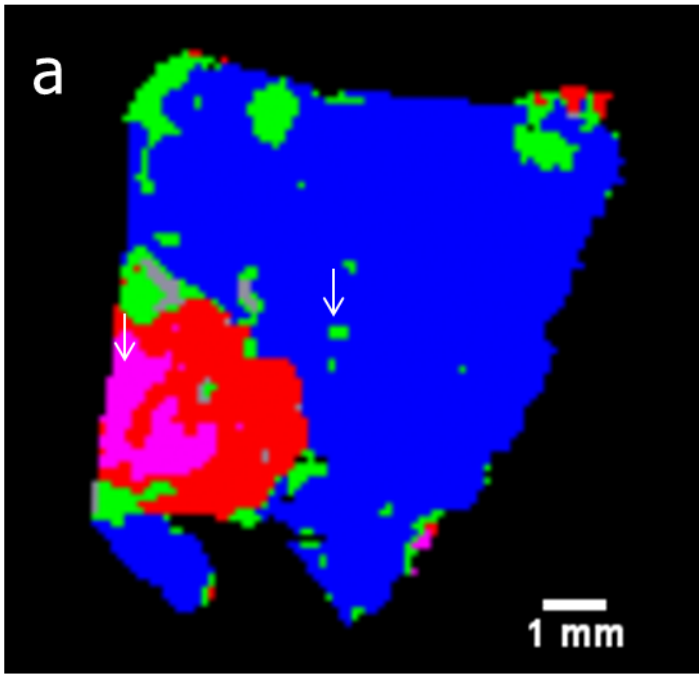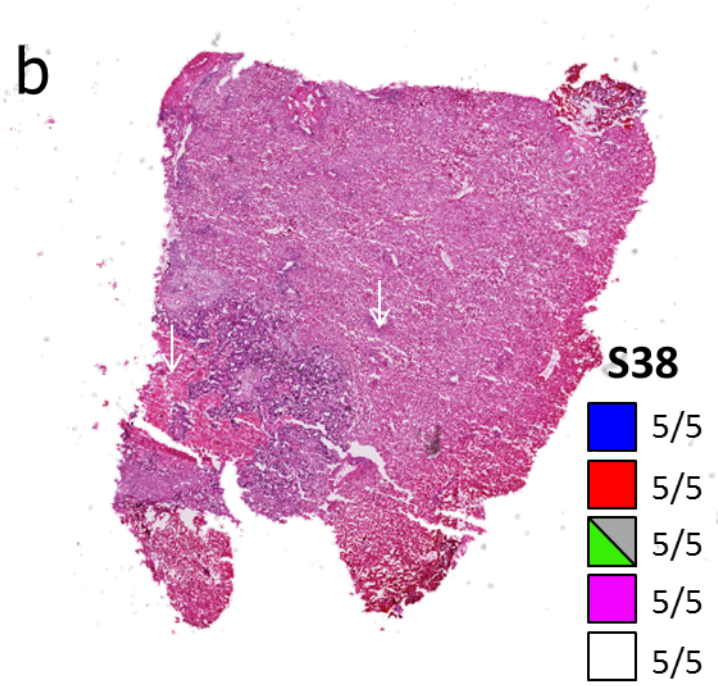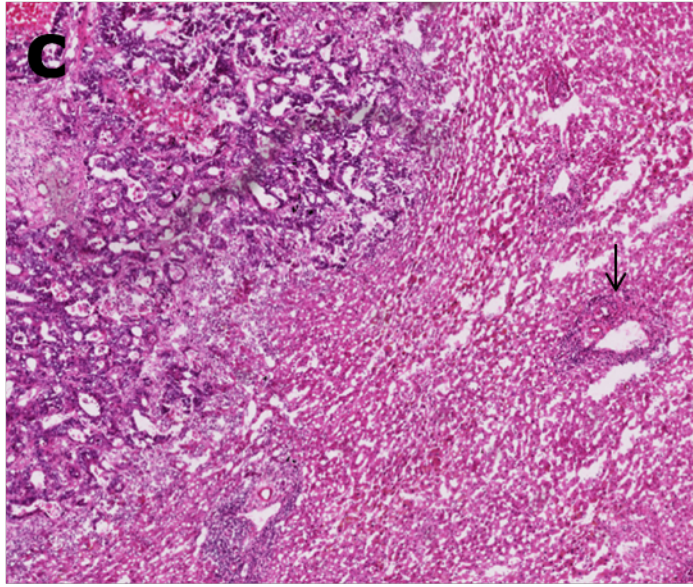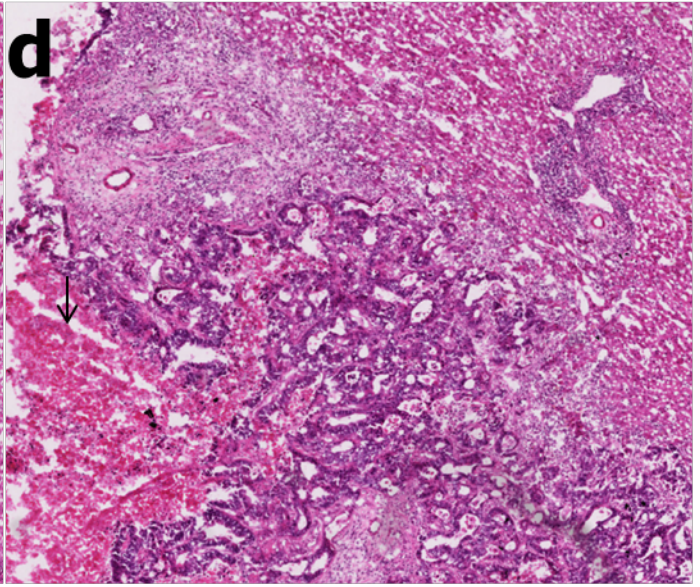

0.5 mm

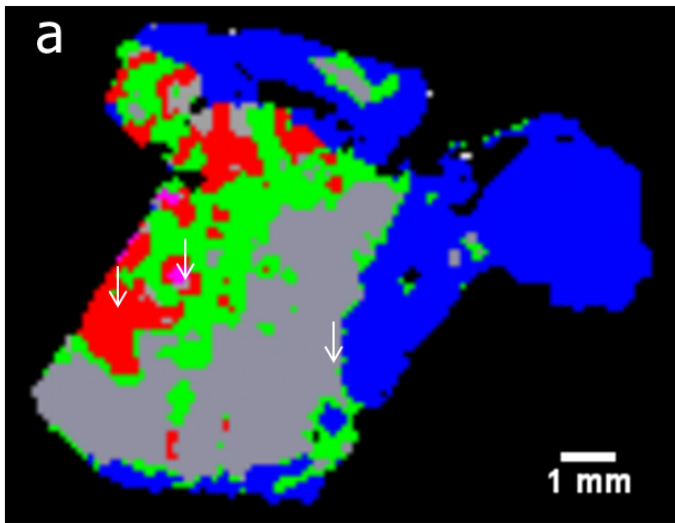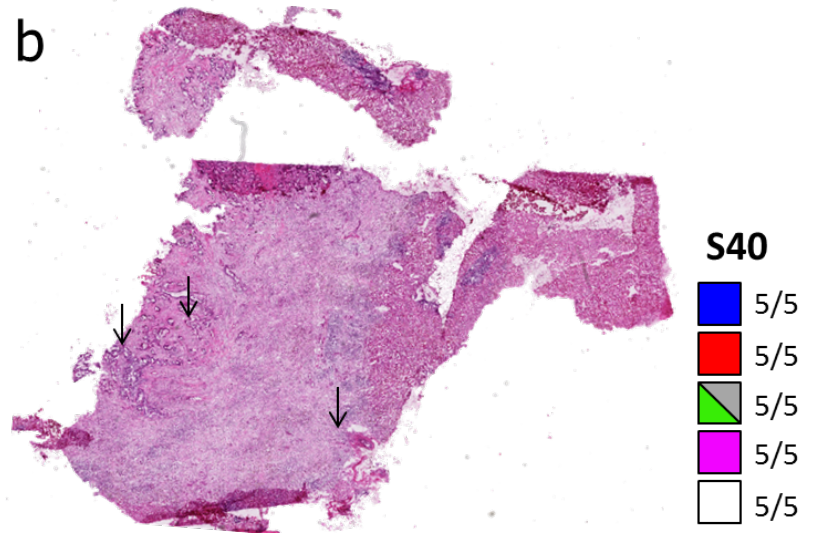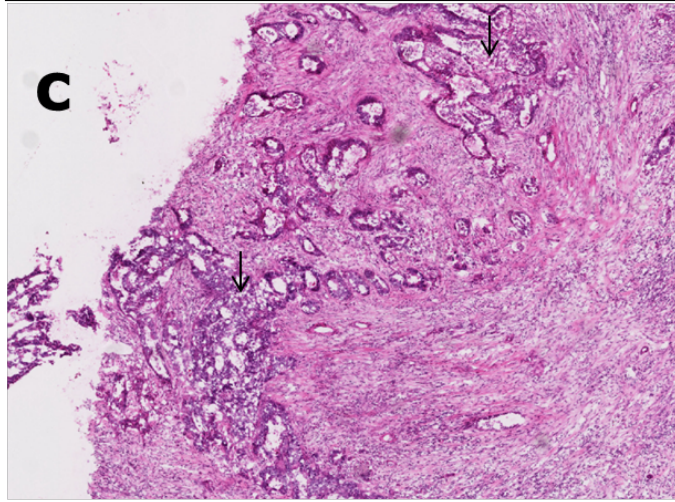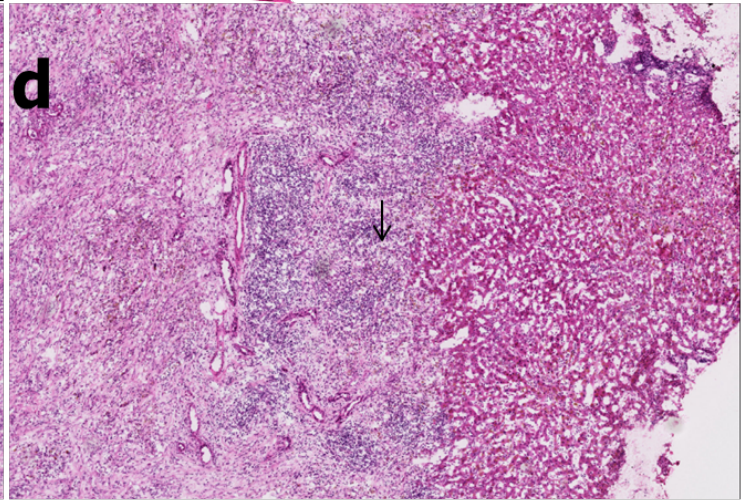

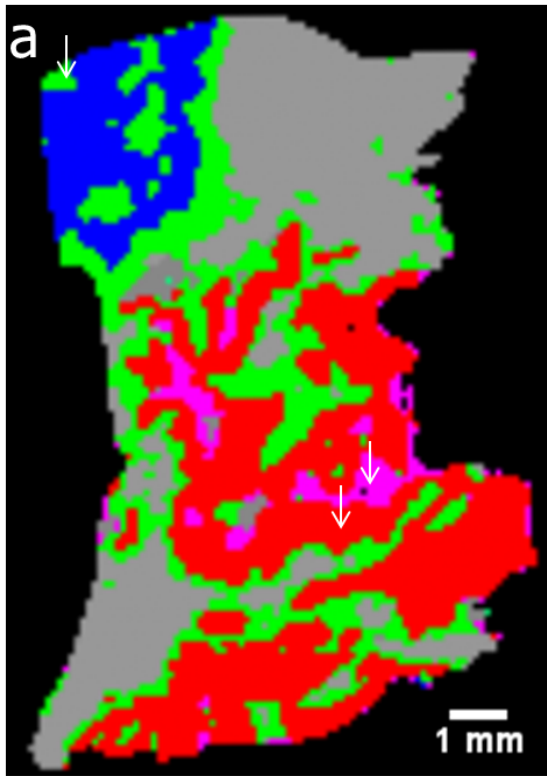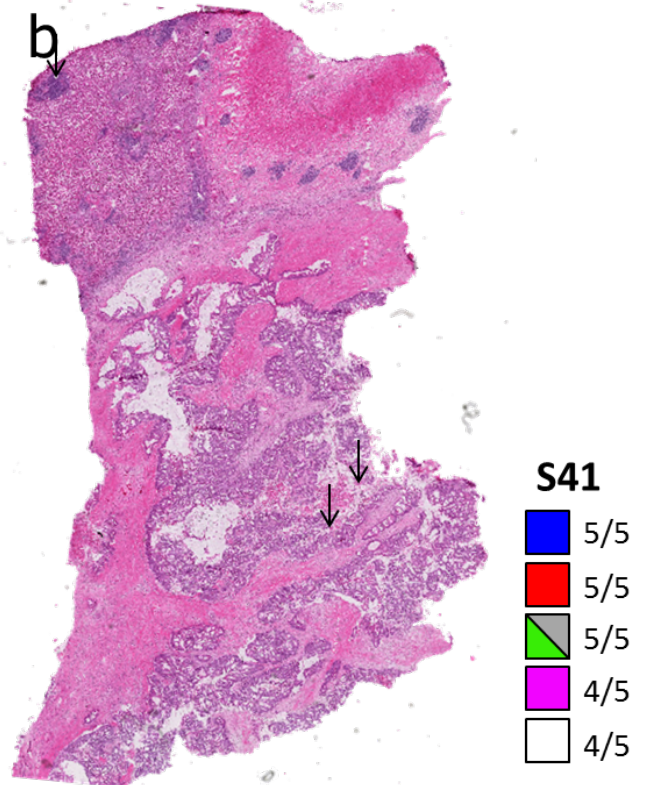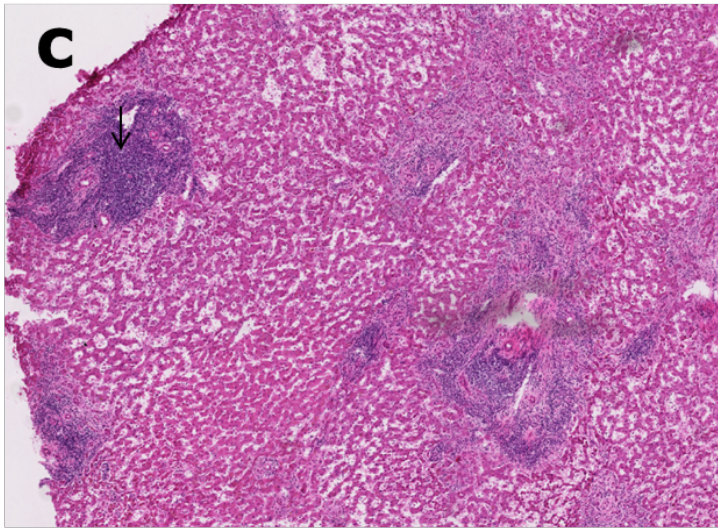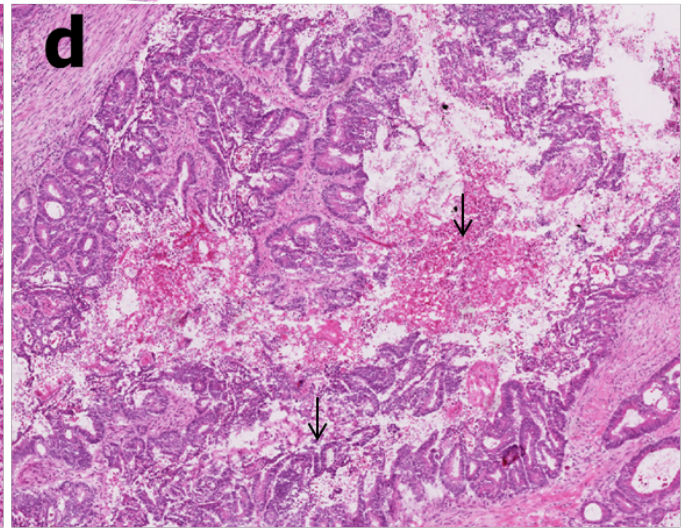



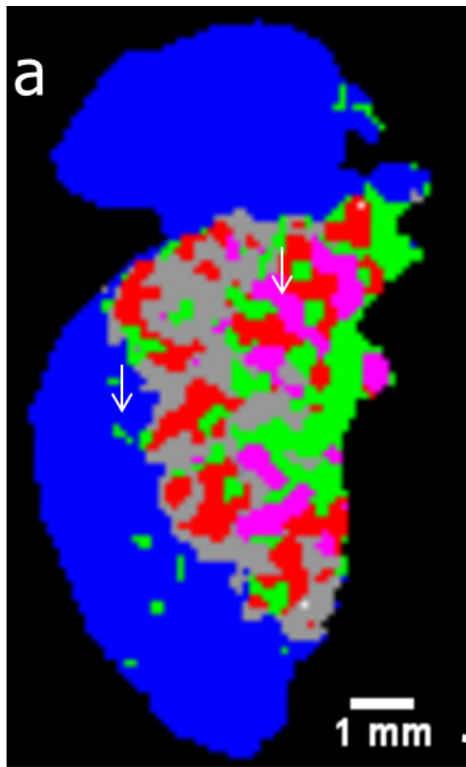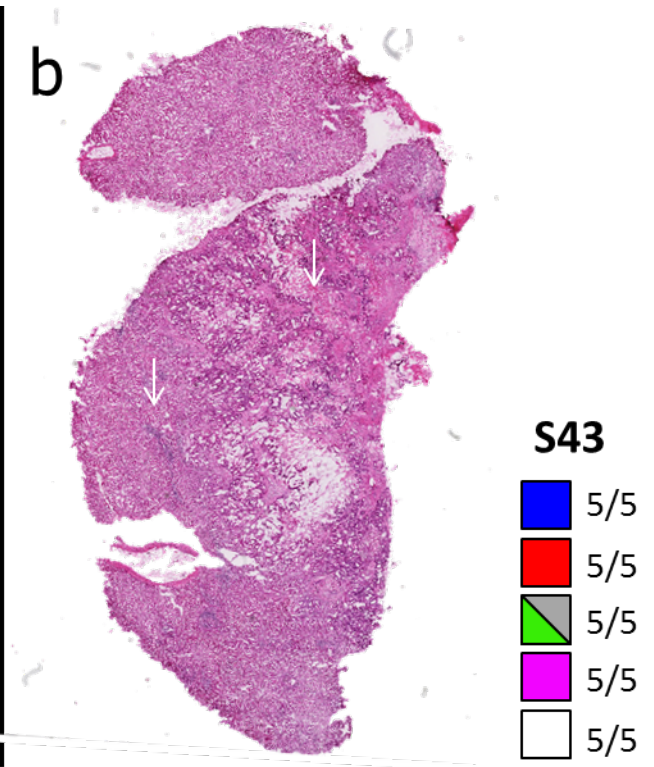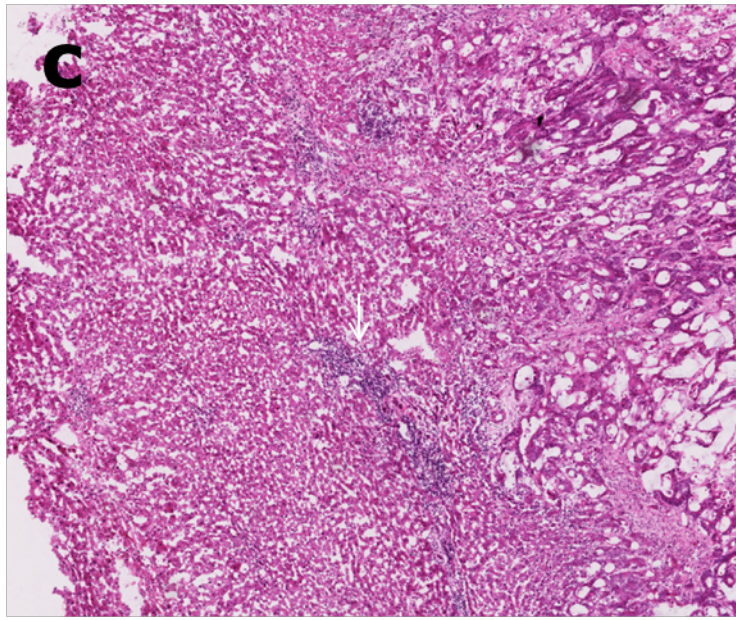

0.5 mm

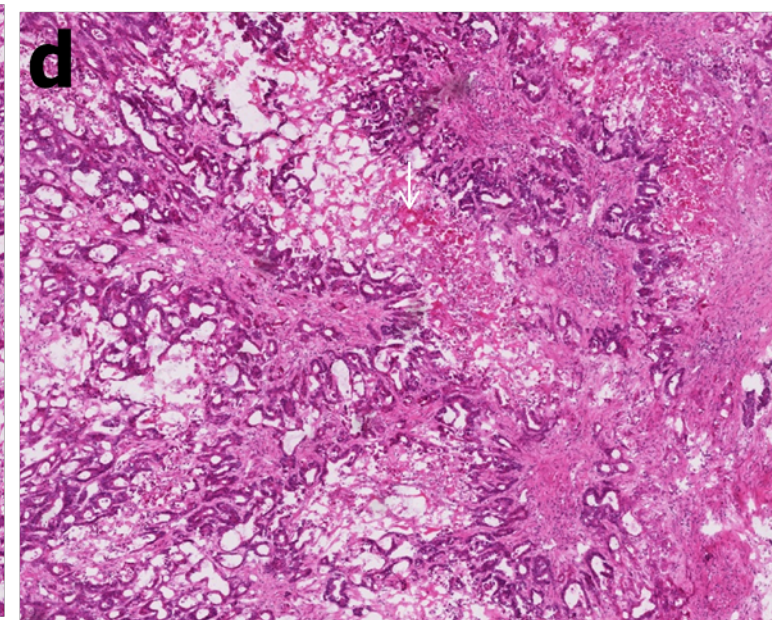

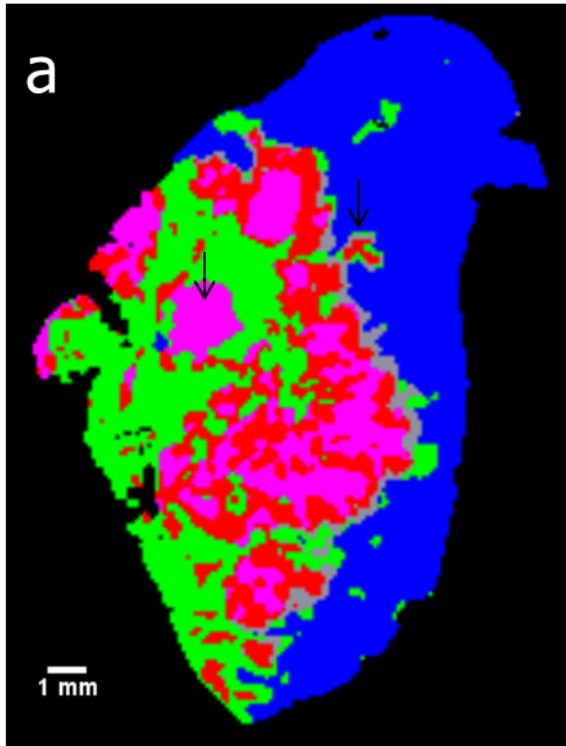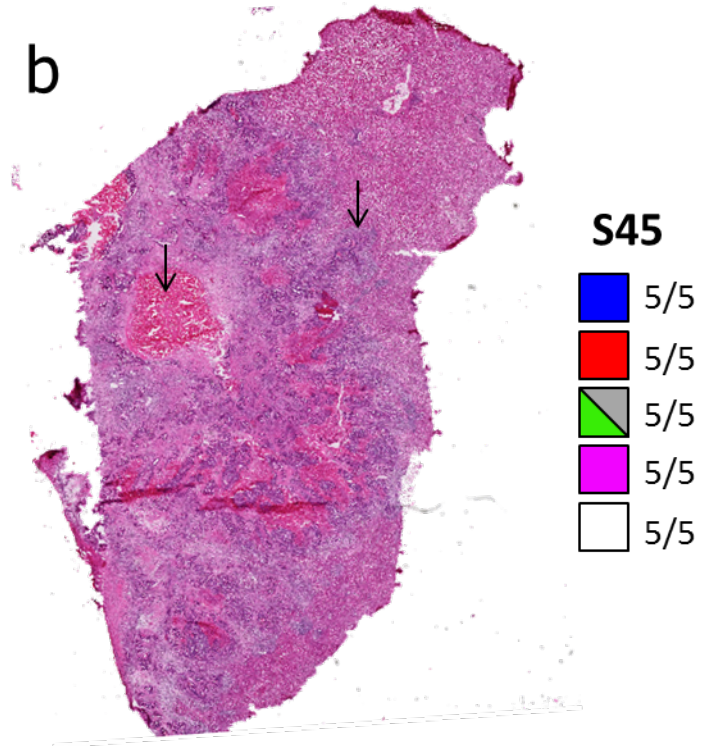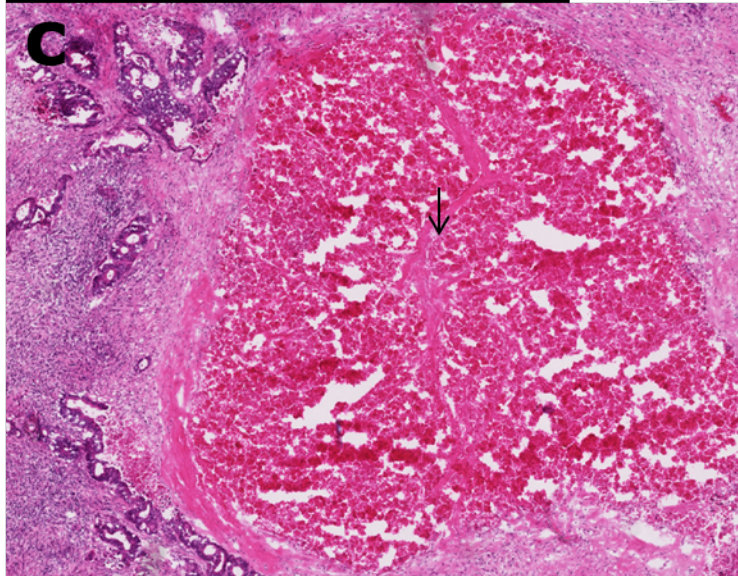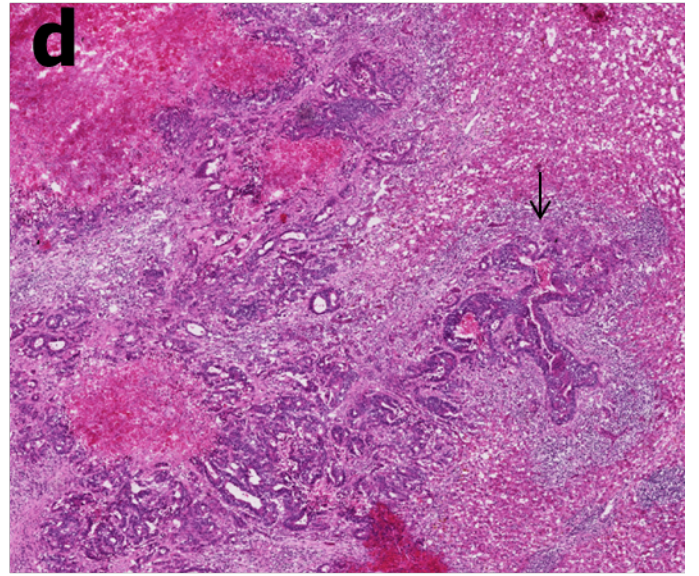

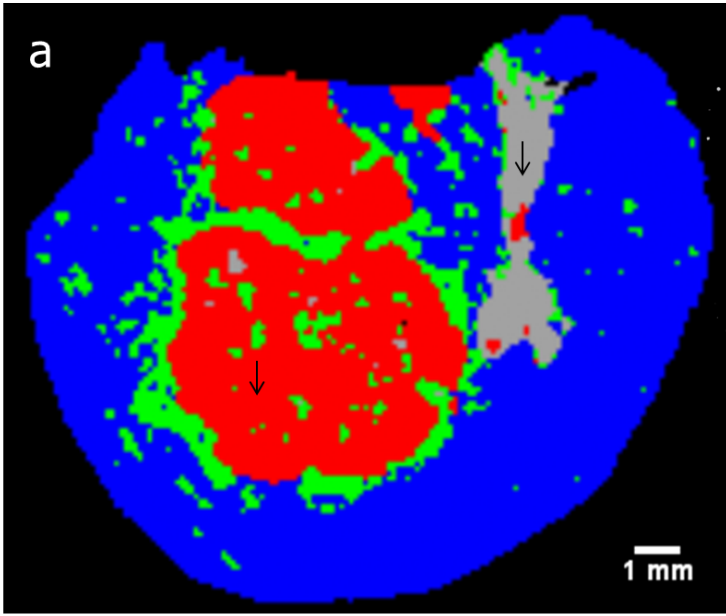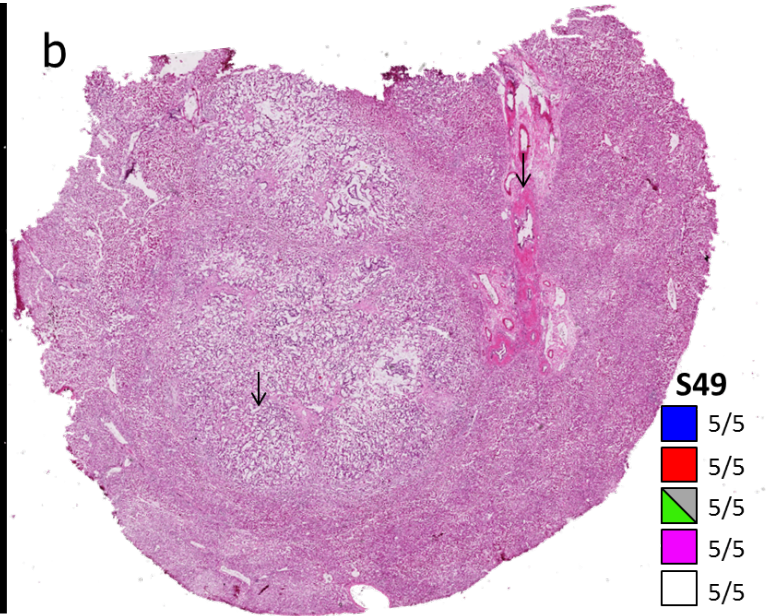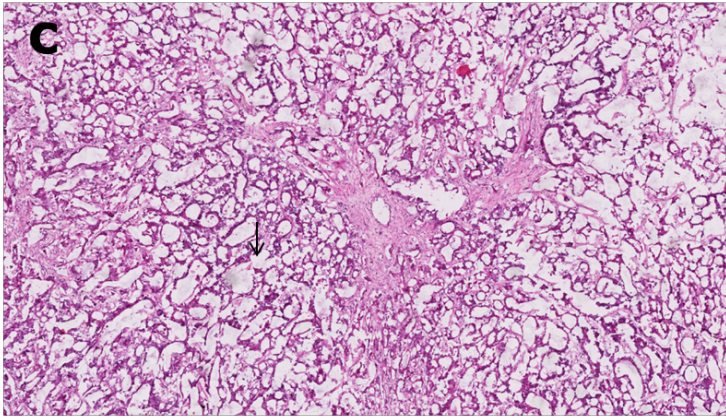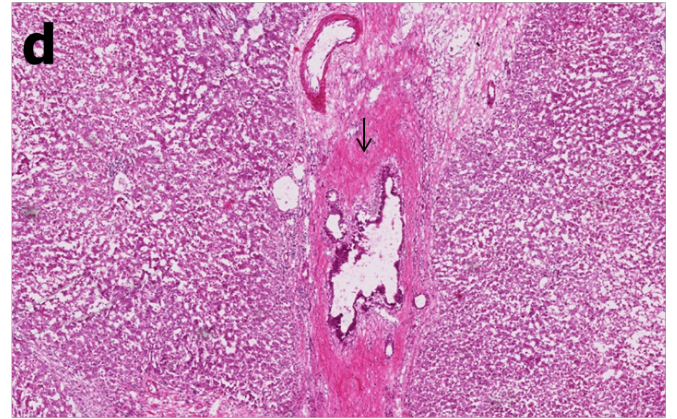

0.5 mm

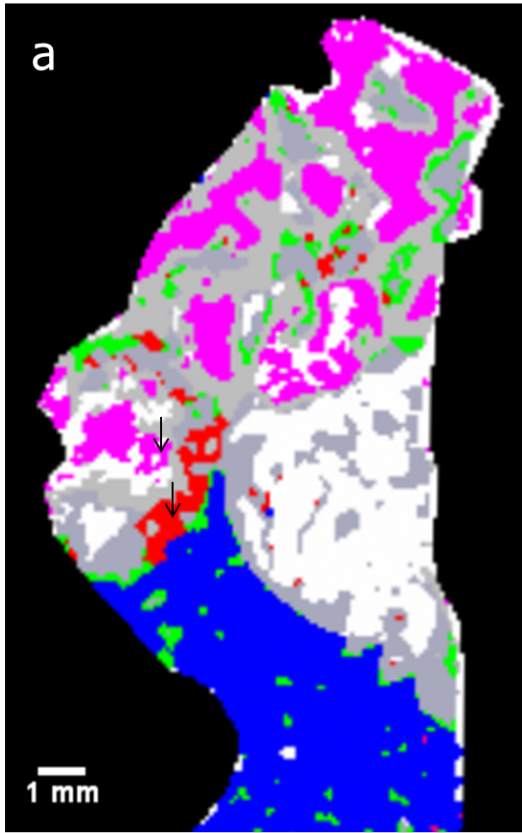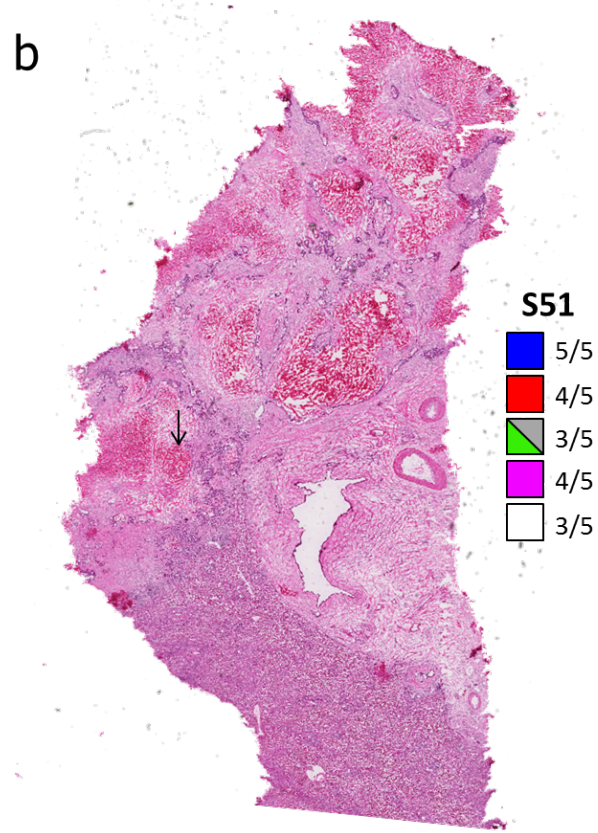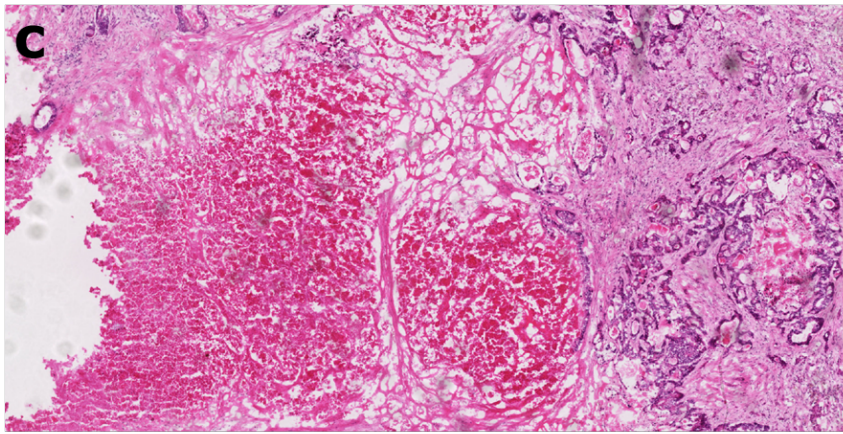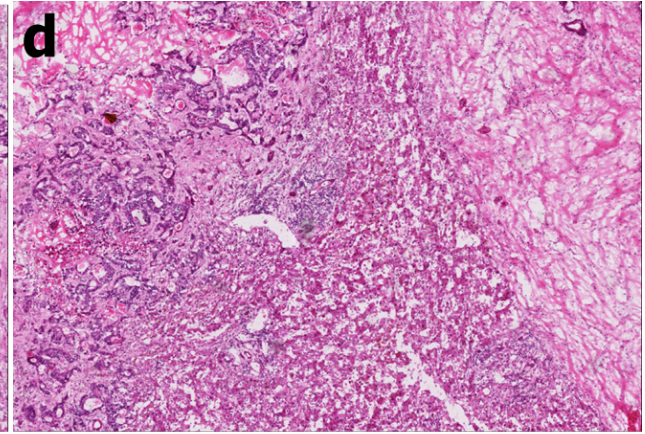

0.5 mm

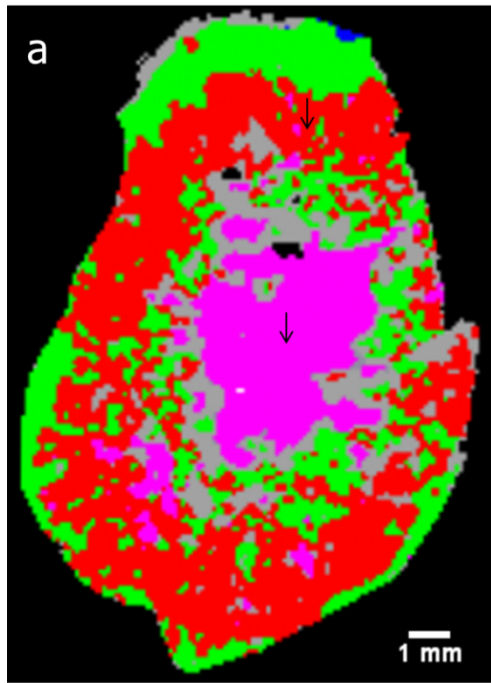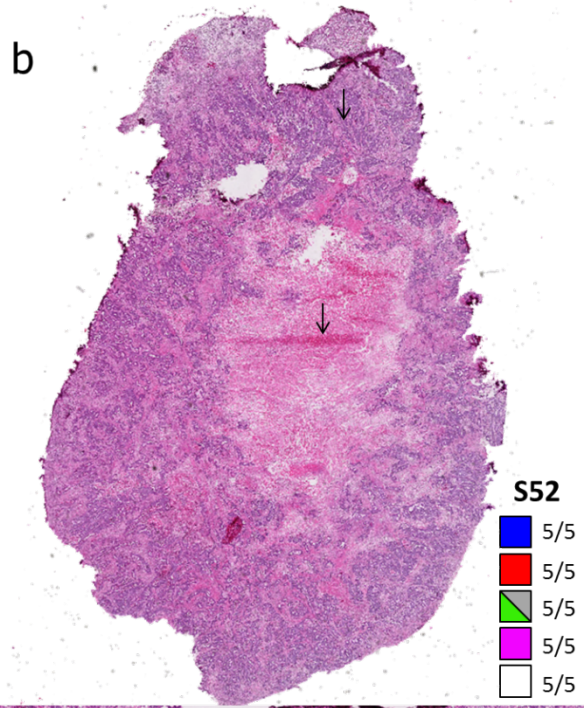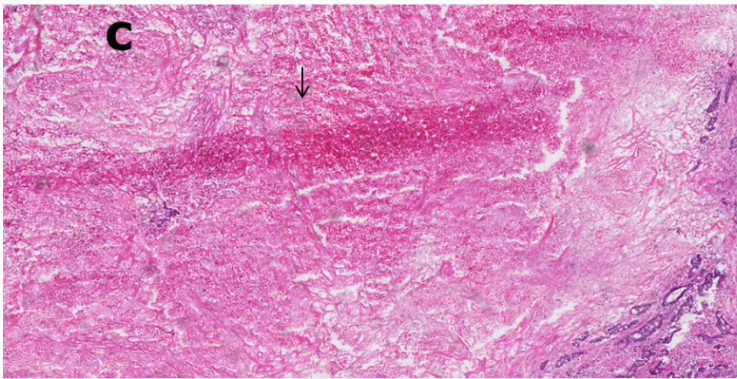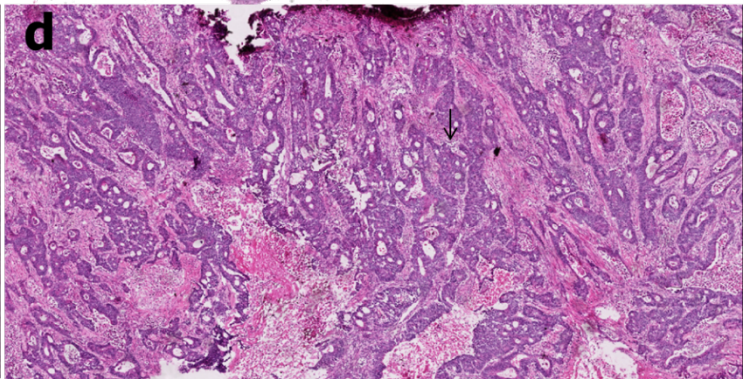

**Supplemental Figure 7:**

**Profiling and lithiated MS/MS of ions co-localized in areas of CRCLM usual necrosis.**

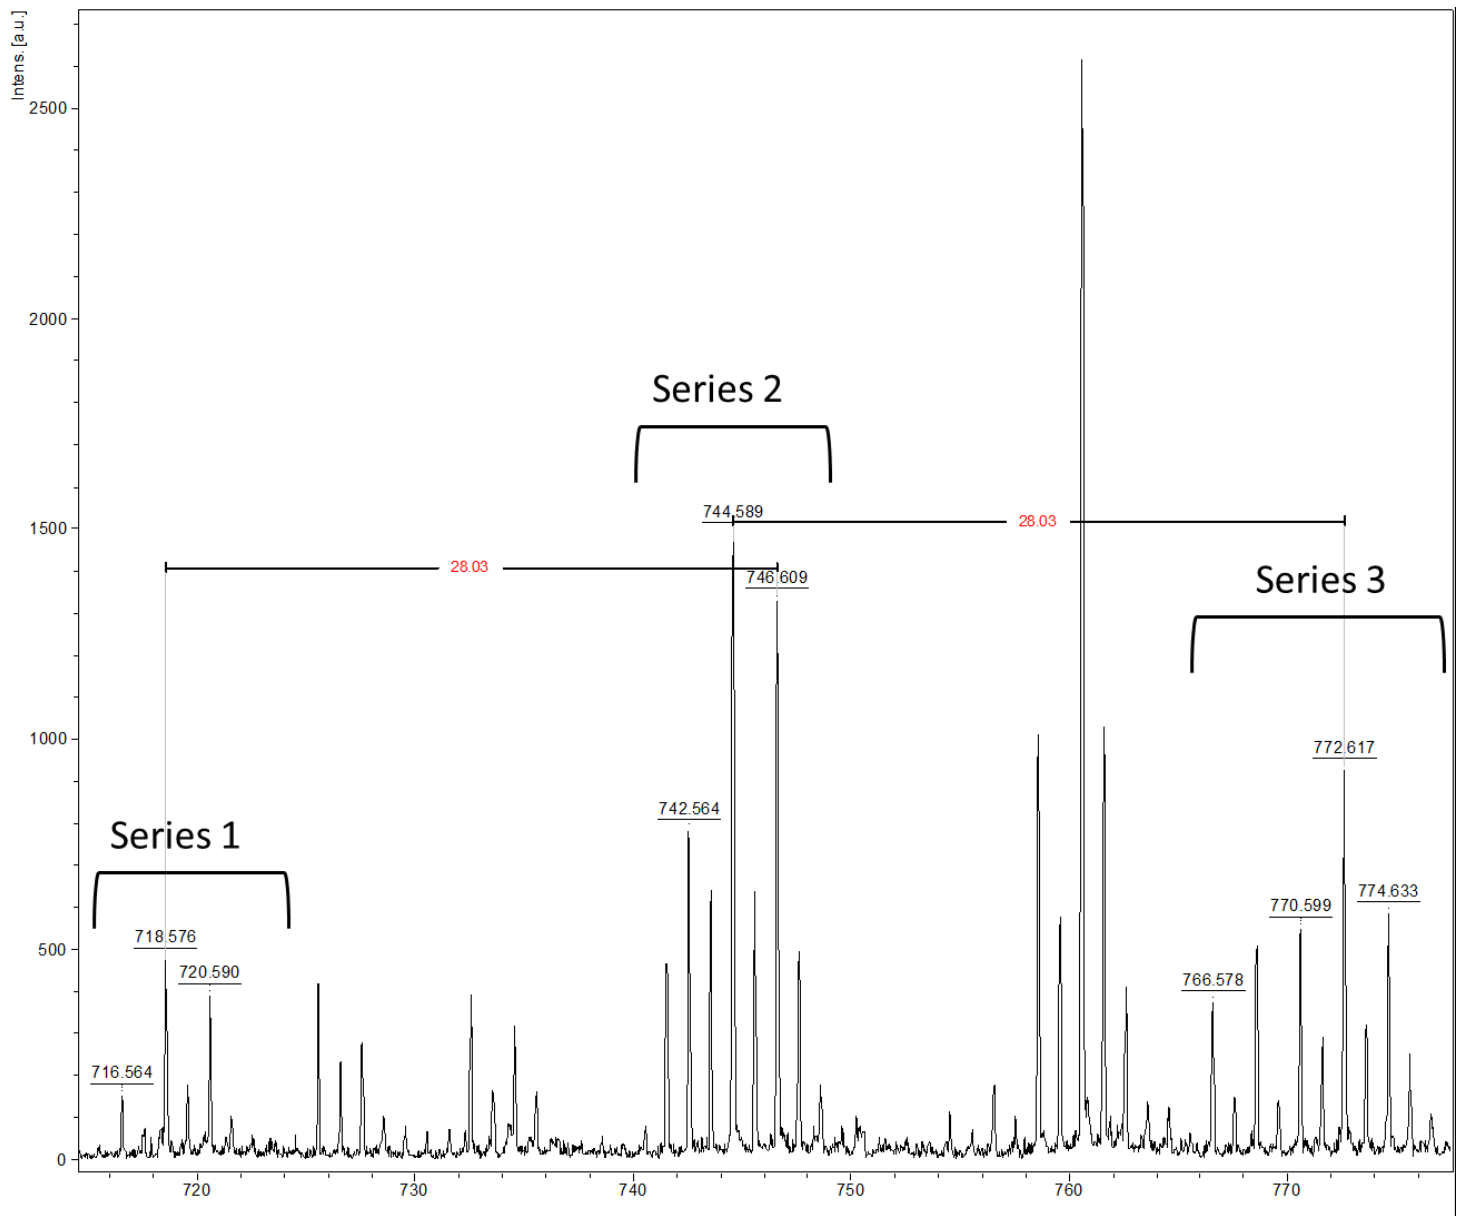

Profile of the three plasmalogen series. Annotations added for 28 Da FA chain elongations between series

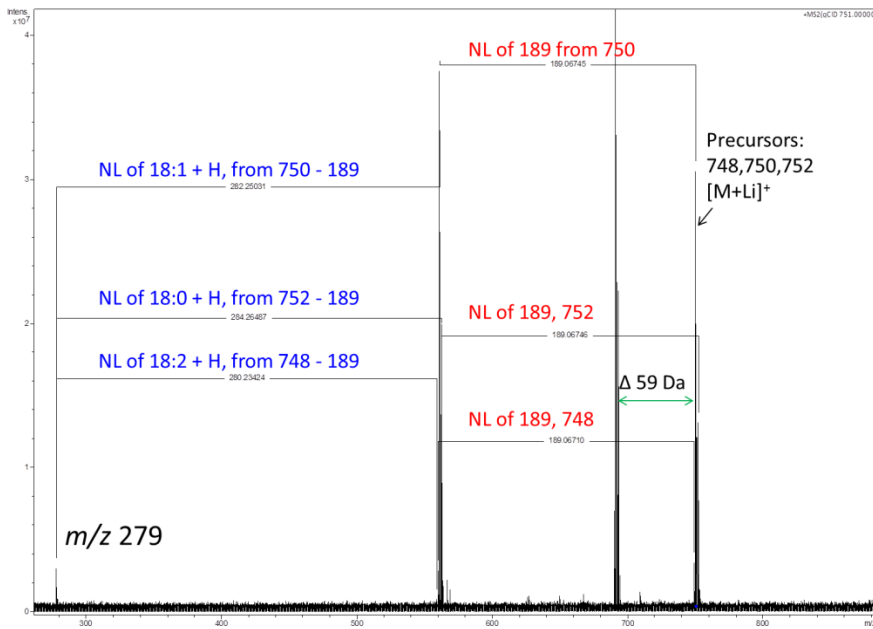

742.574, PC(p-16:0/18:2)

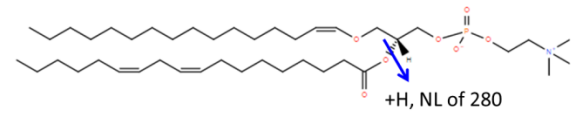

744.590, PC(p-16:0/18:1)

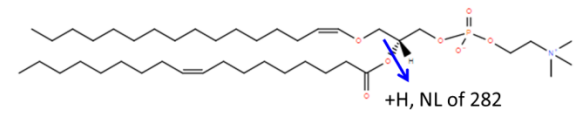

746.590, PC(p-16:0/18:0)

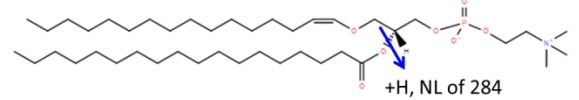

MS/MS of Series 2, isolation window 747.5-753.5. Three precursor ions.

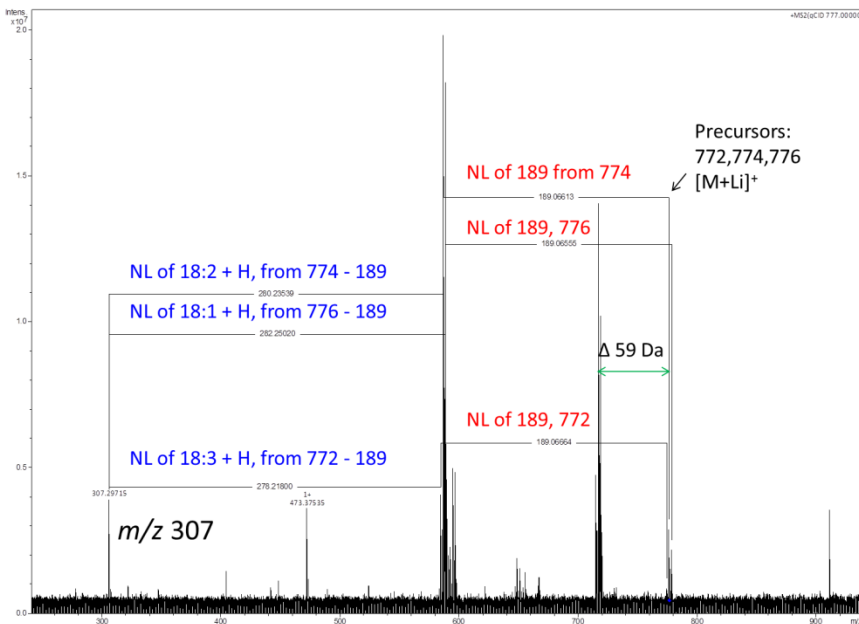

766.574, PC(p-18:0/18:3)

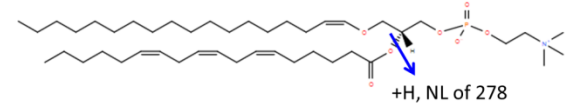

768.590, PC(p-18:0/18:2)

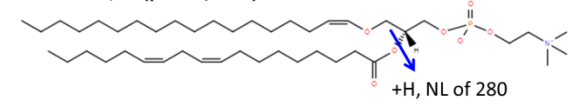

770.590, PC(p-18:0/18:1)

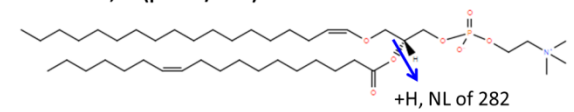

MS/MS of Series 3, isolation window 771.5-777.5. Three precursor ions.

## Supplemental Figure 8:

### MS/MS of ceramide species co-localized in areas of CRCLM UN (C16 Ceramide) and ILN(Cer-1-P):

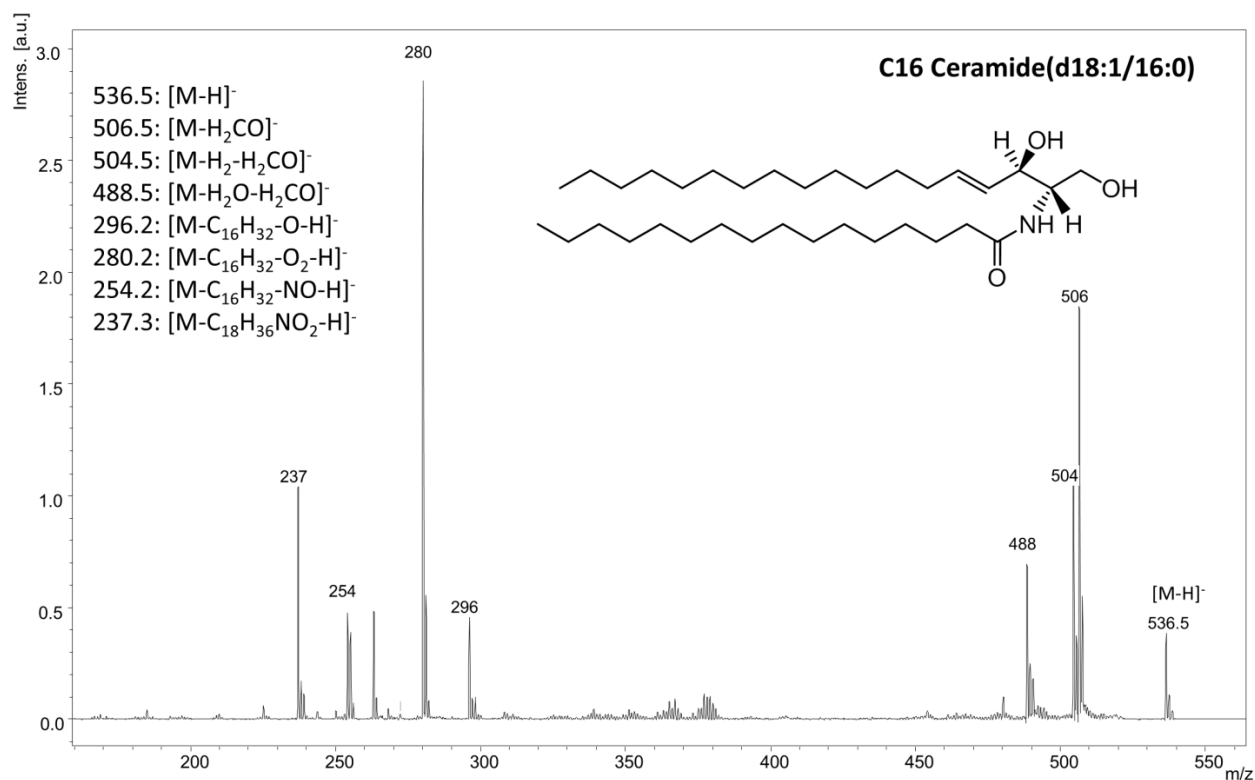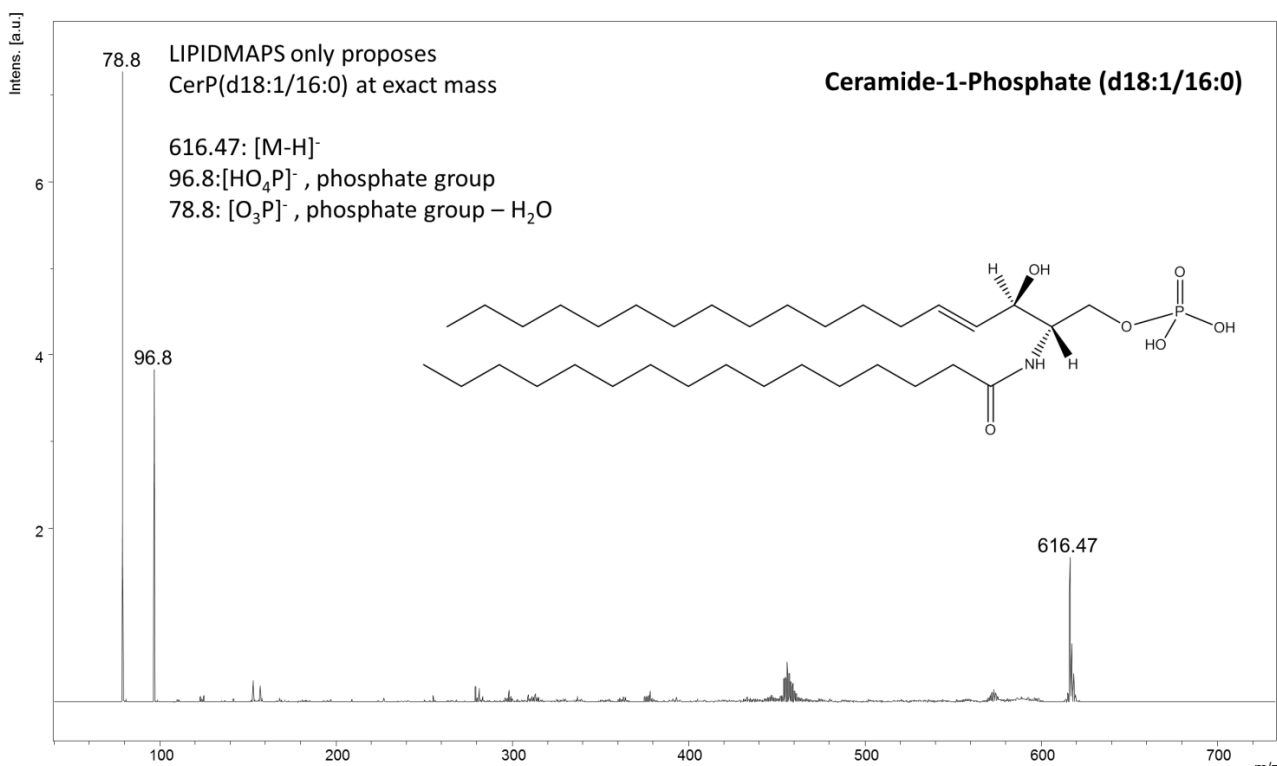

**This MS/MS identifies primarily the very labile phosphate group. For this mass, Cer-1-P is the only entry in LIPIDMAPS and the Human Metabolome Database.**



### Overall Survival and Disease Free Survival of the entire study population

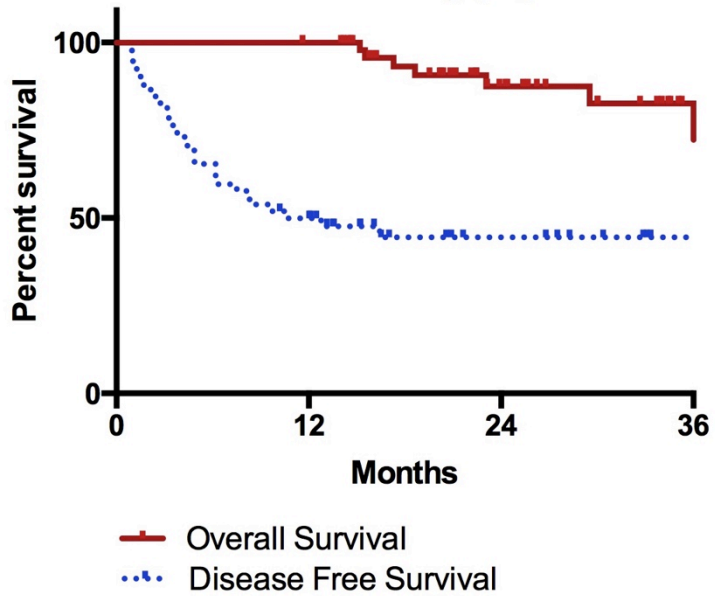

**Supplemental Figure 9. Overall Survival (OS) and Disease Free Survival (DFS) of the entire population.**

Estimated 1-year and 3-year OS were at 100%, and 82.6% respectively (26.5 months mean follow up duration). Estimated 1-year, and 3-year DFS for liver metastasis were at 49.9%, and 44.4% respectively (26.5 months mean follow up duration).
